# Supplementary material for: Identification of genome-wide SNP-SNP interactions associated with important traits in chicken
Source: PubMed Central journal article supplement (PMC5698929; doi:10.1186/s12864-017-4252-y), 2017-11-21

**Histogram for BW1 in the lean and fat lines**

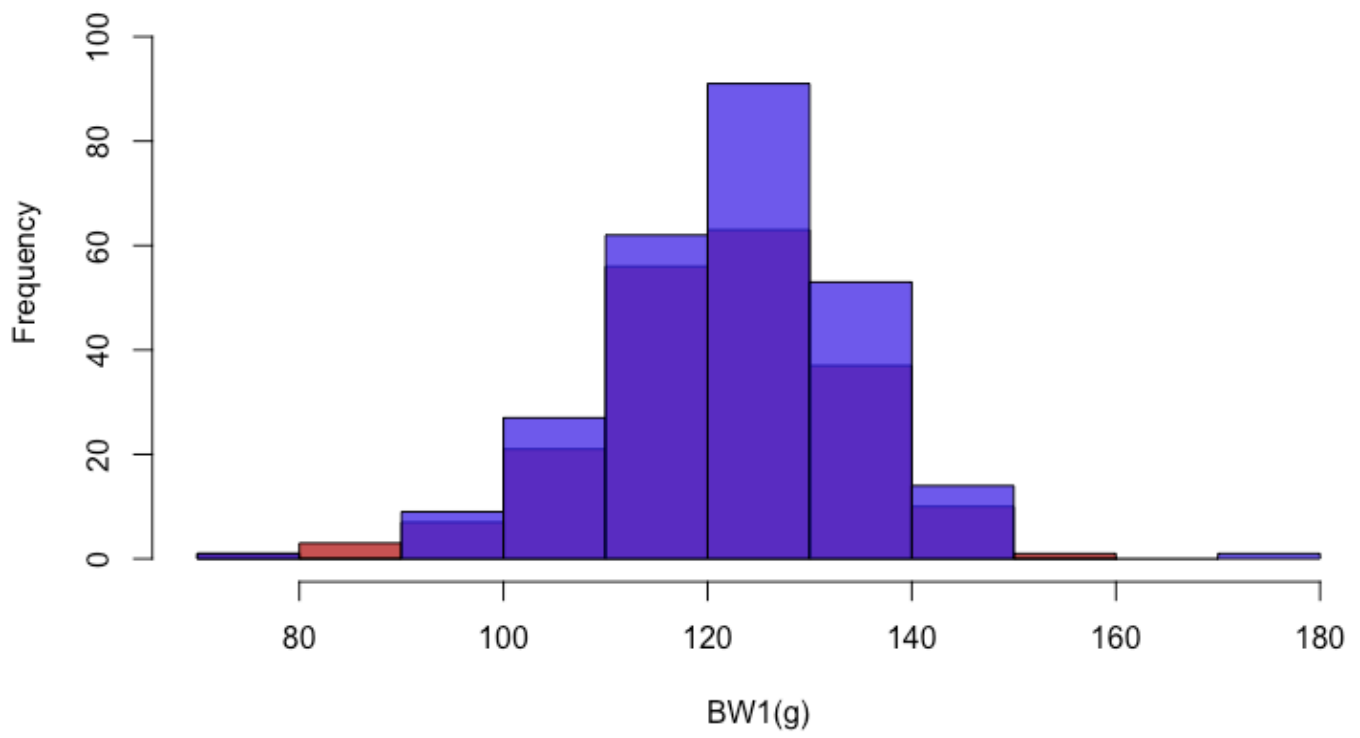

**Histogram for BW3 in the lean and fat lines**

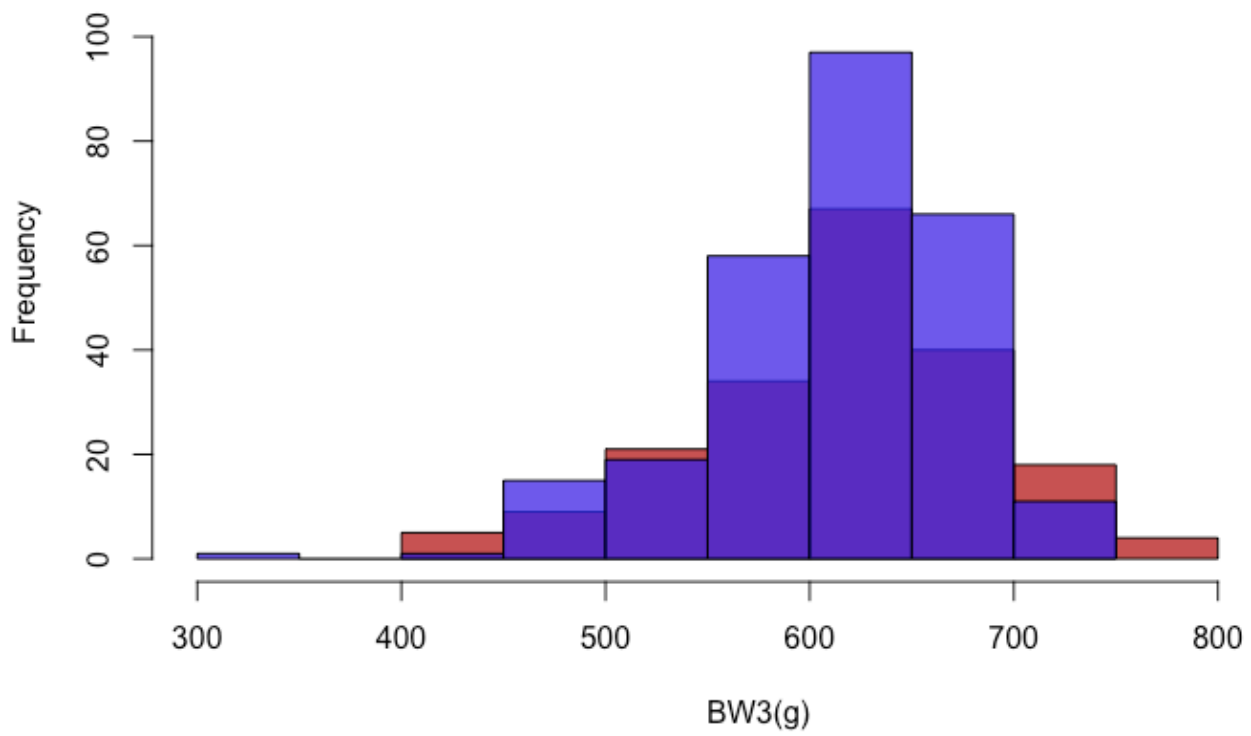

**Histogram for BW5 in the lean and fat lines**

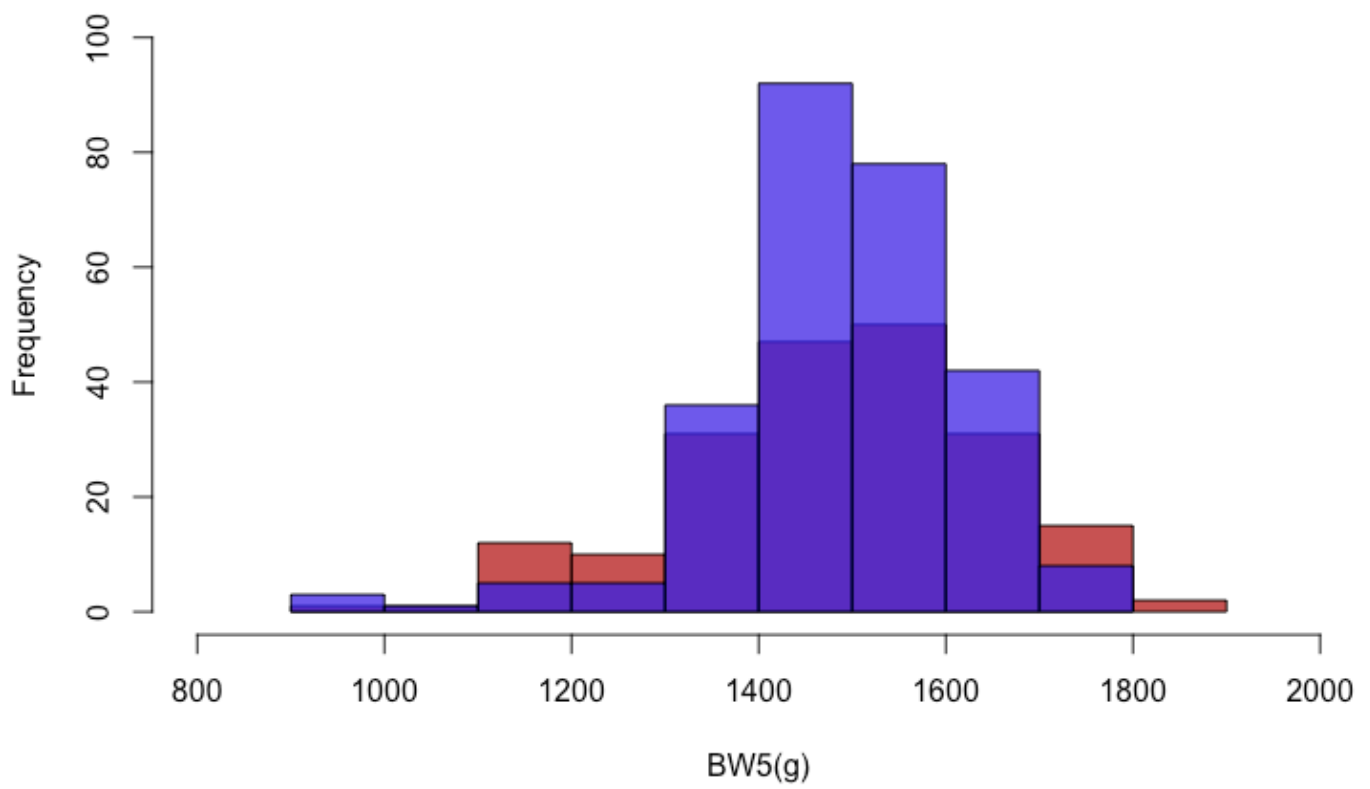

Histogram for BW7 in the lean and fat lines

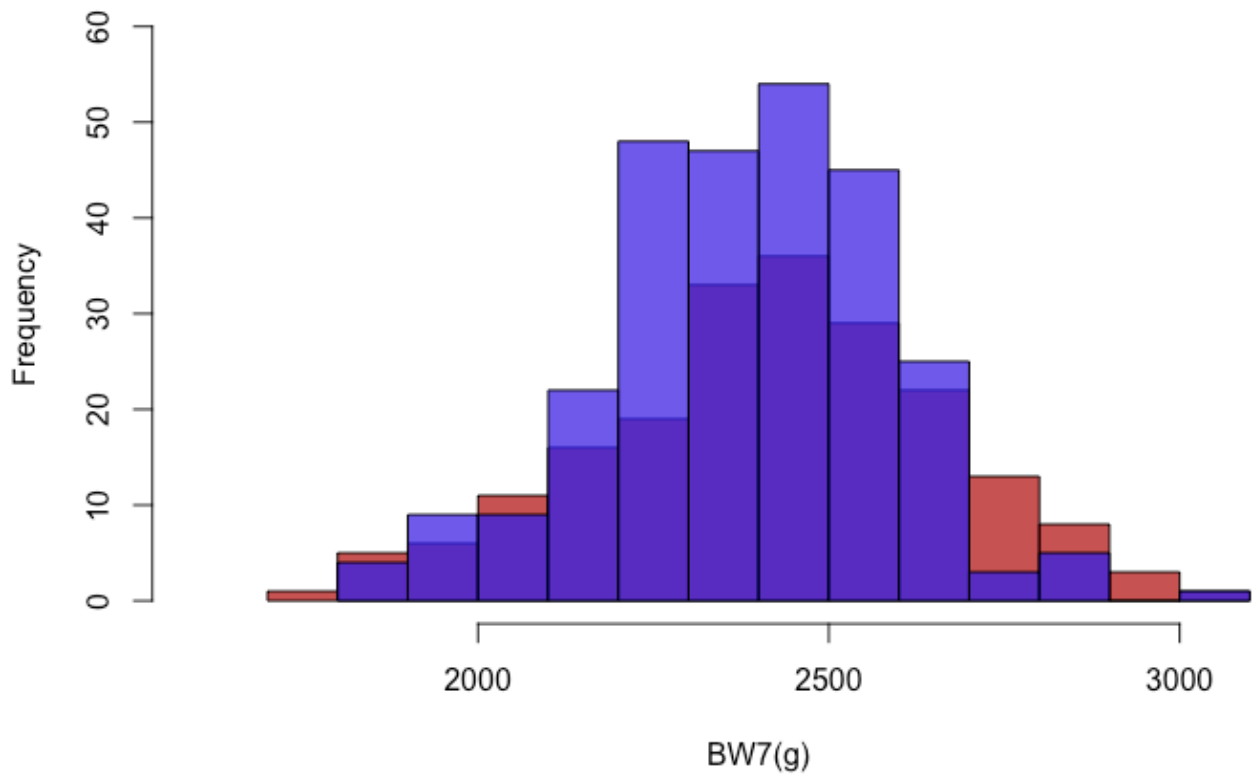

**Histogram for ChWi in the lean and fat lines**

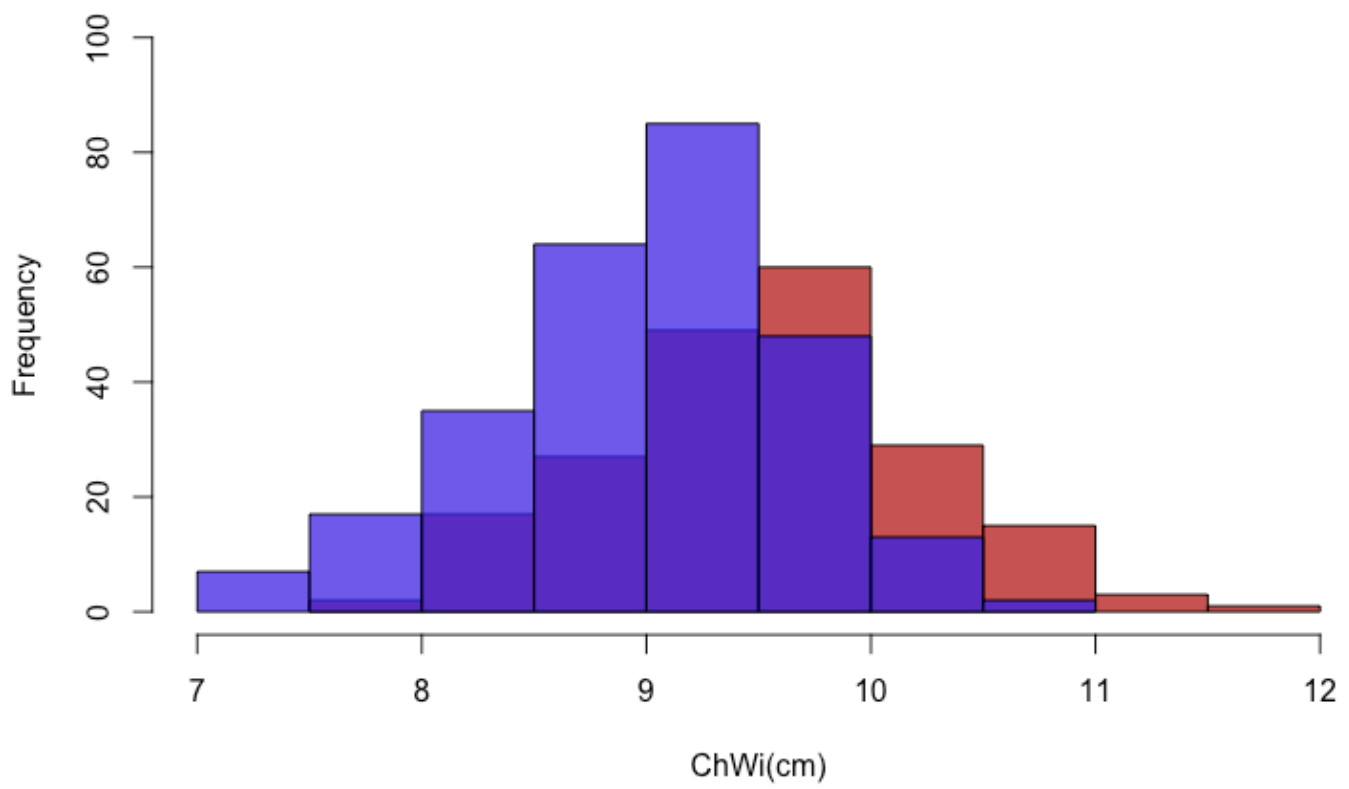

**Histogram for CW in the lean and fat lines**

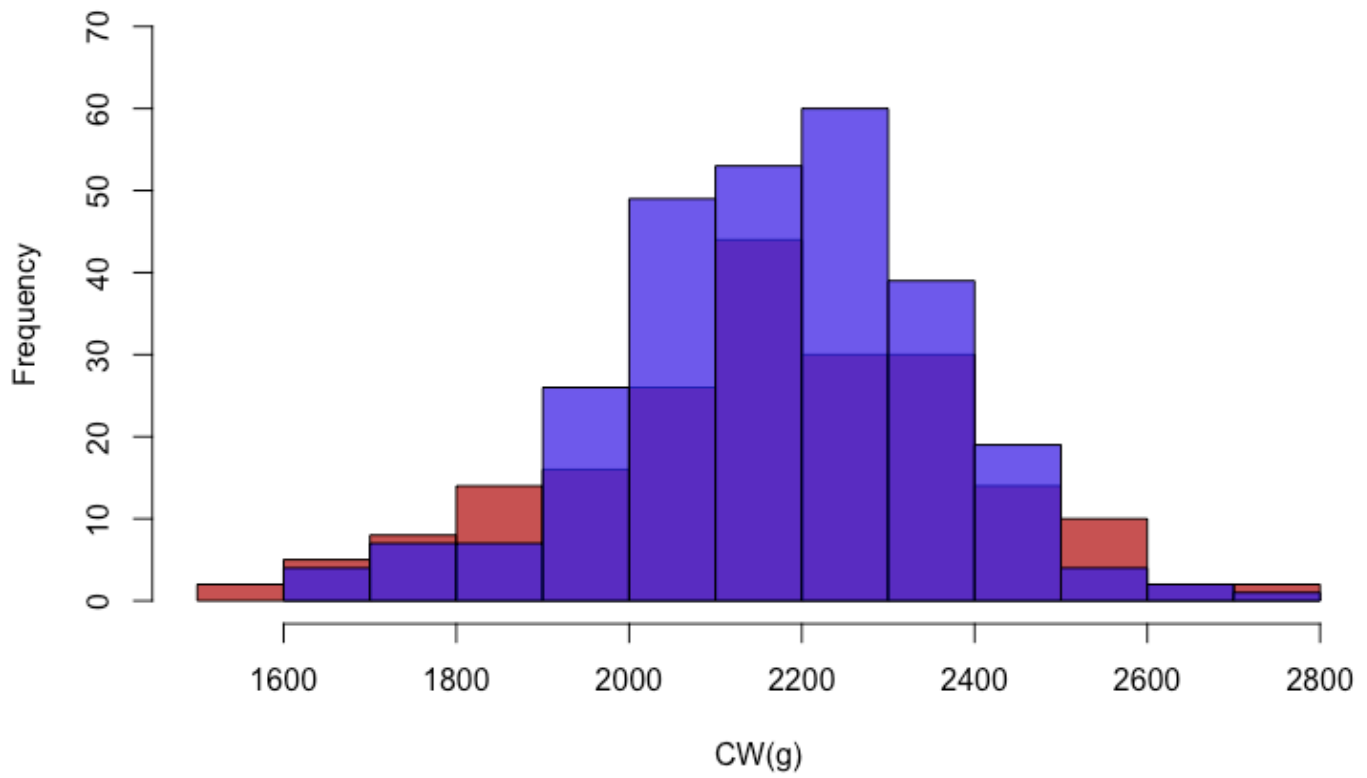

**Histogram for HW in the lean and fat lines**

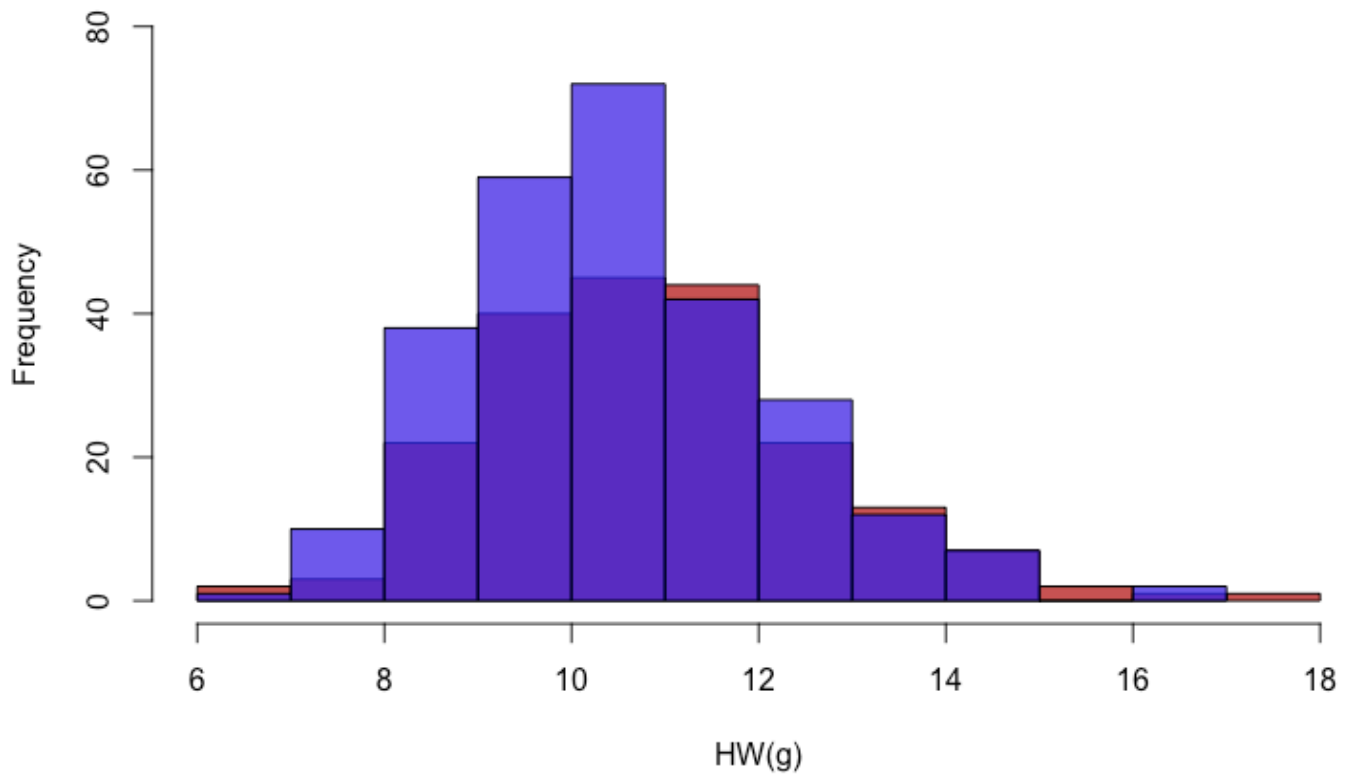

**Histogram for LW in the lean and fat lines**

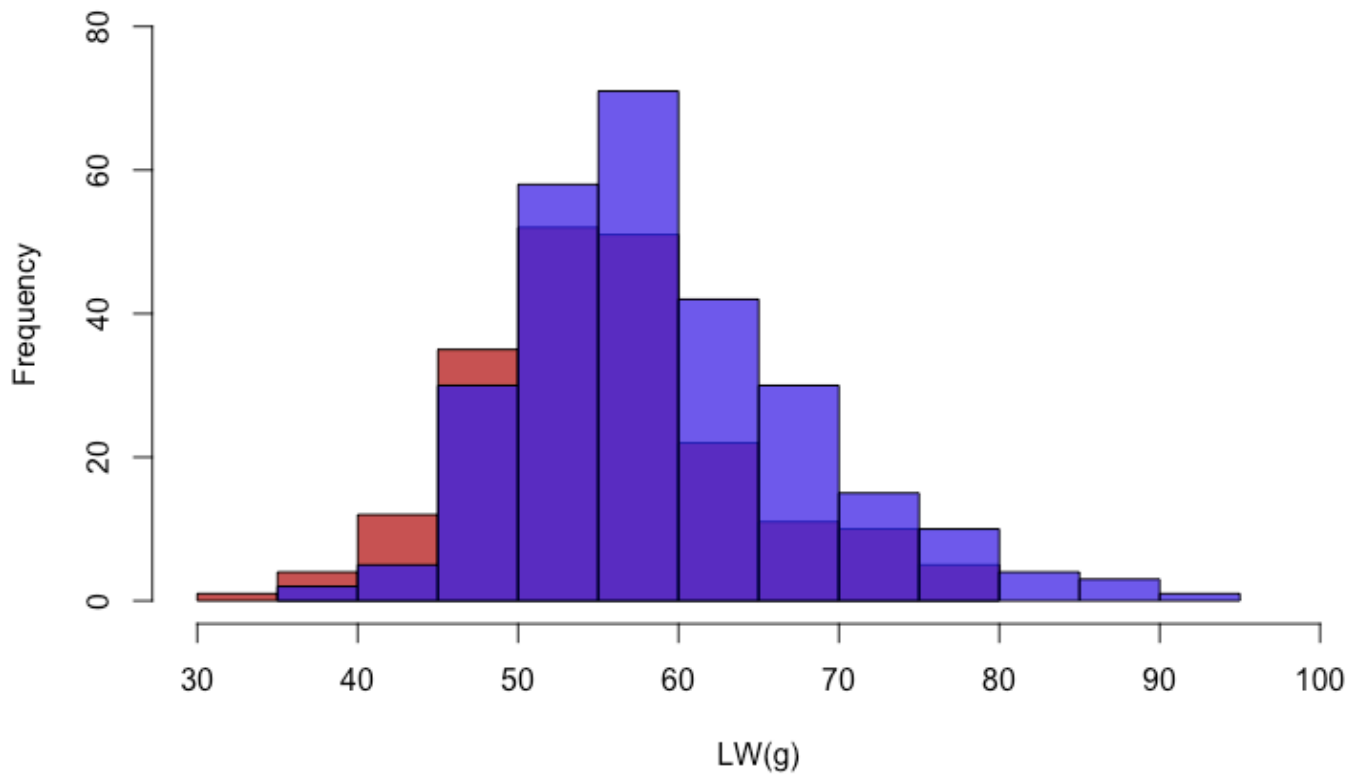



**Histogram for MeC in the lean and fat lines**

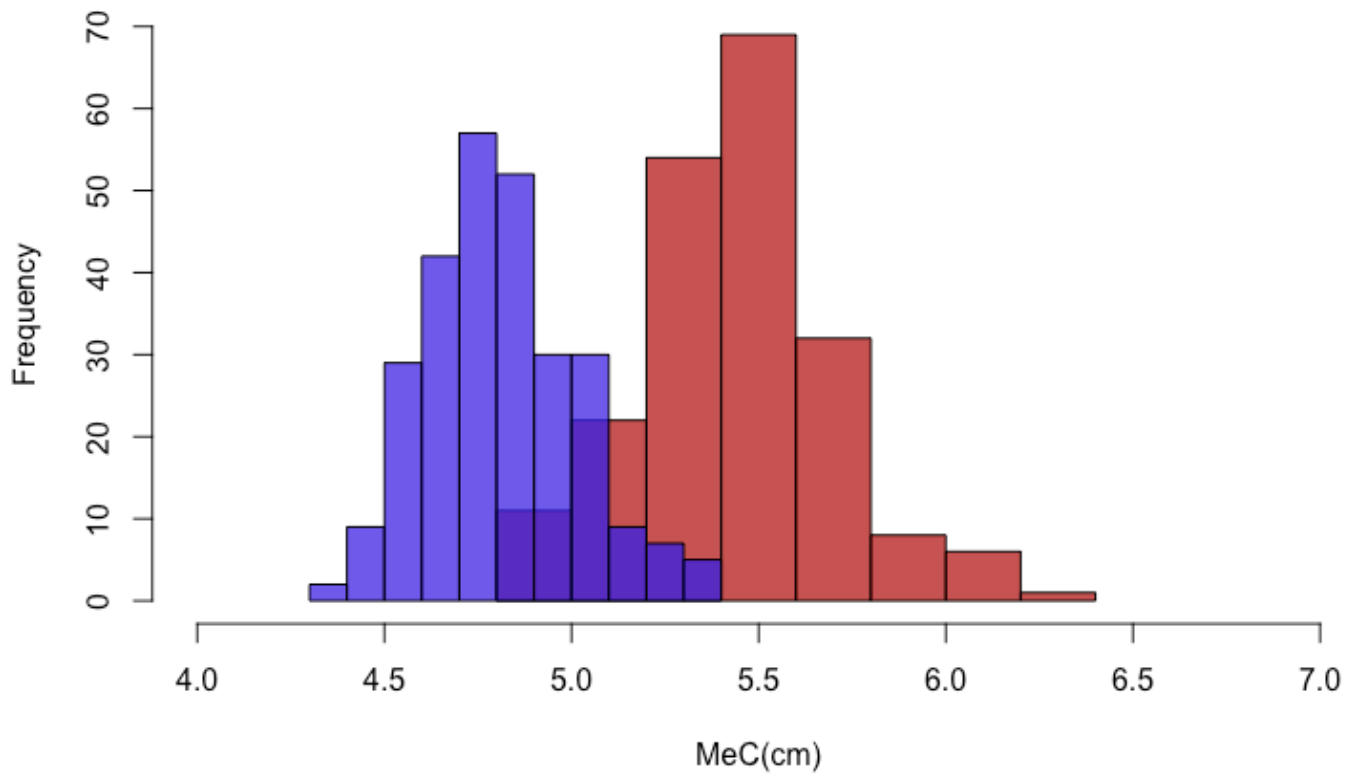

**Histogram for MeL in the lean and fat lines**

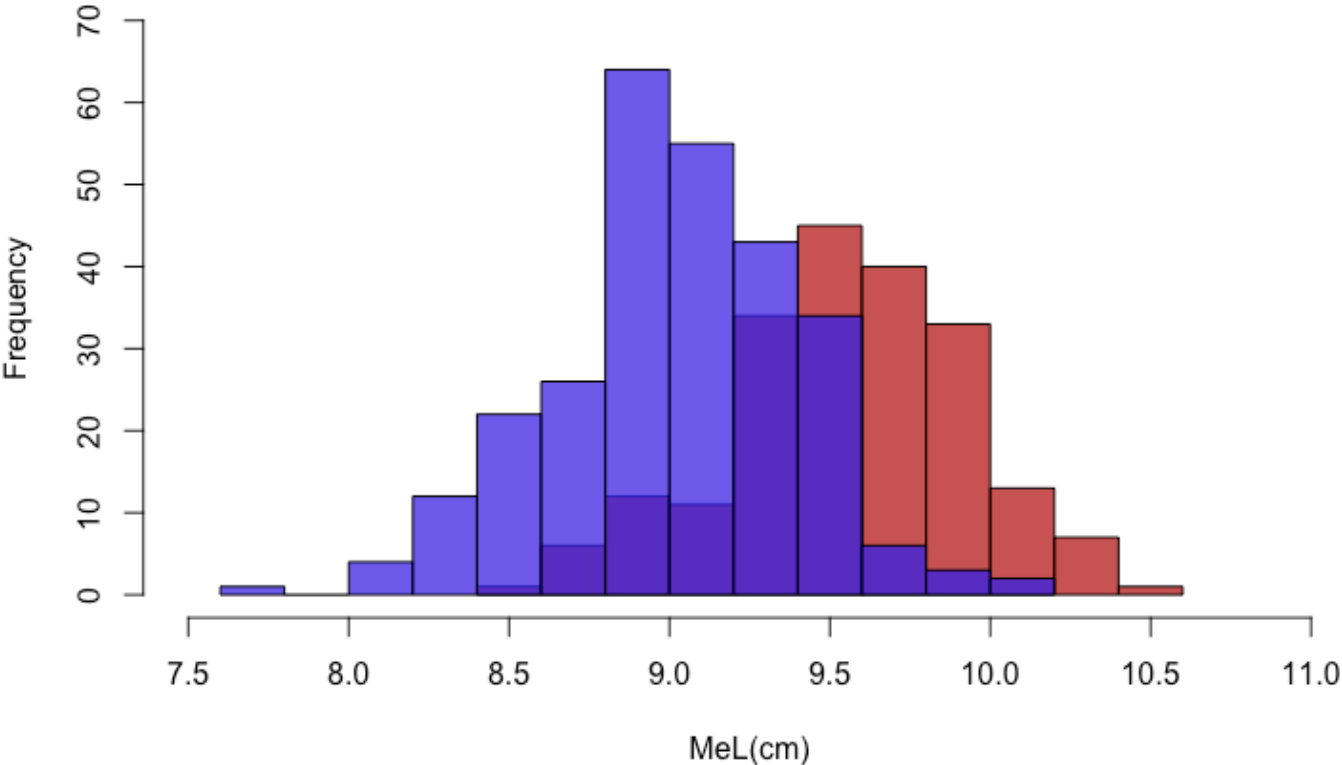

**Histogram for MGSW in the lean and fat lines**

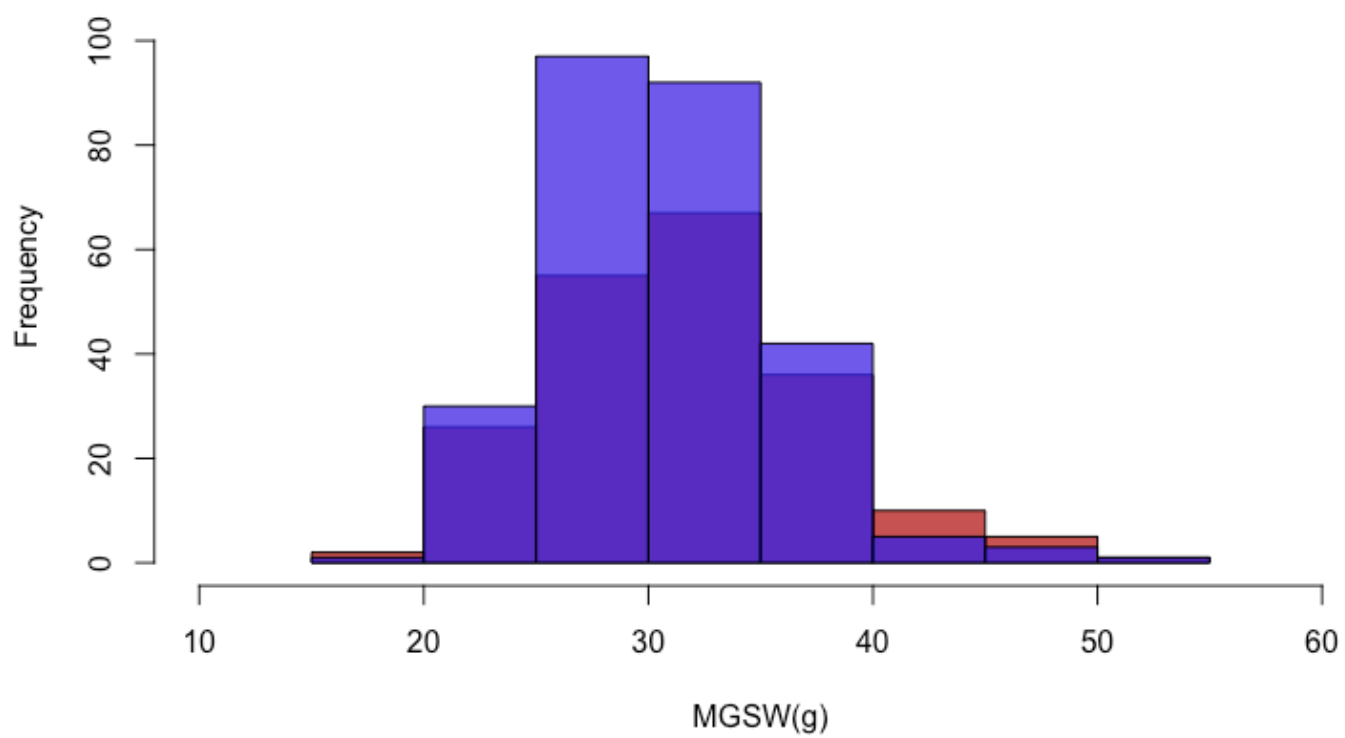

Histogram for SW in the lean and fat lines

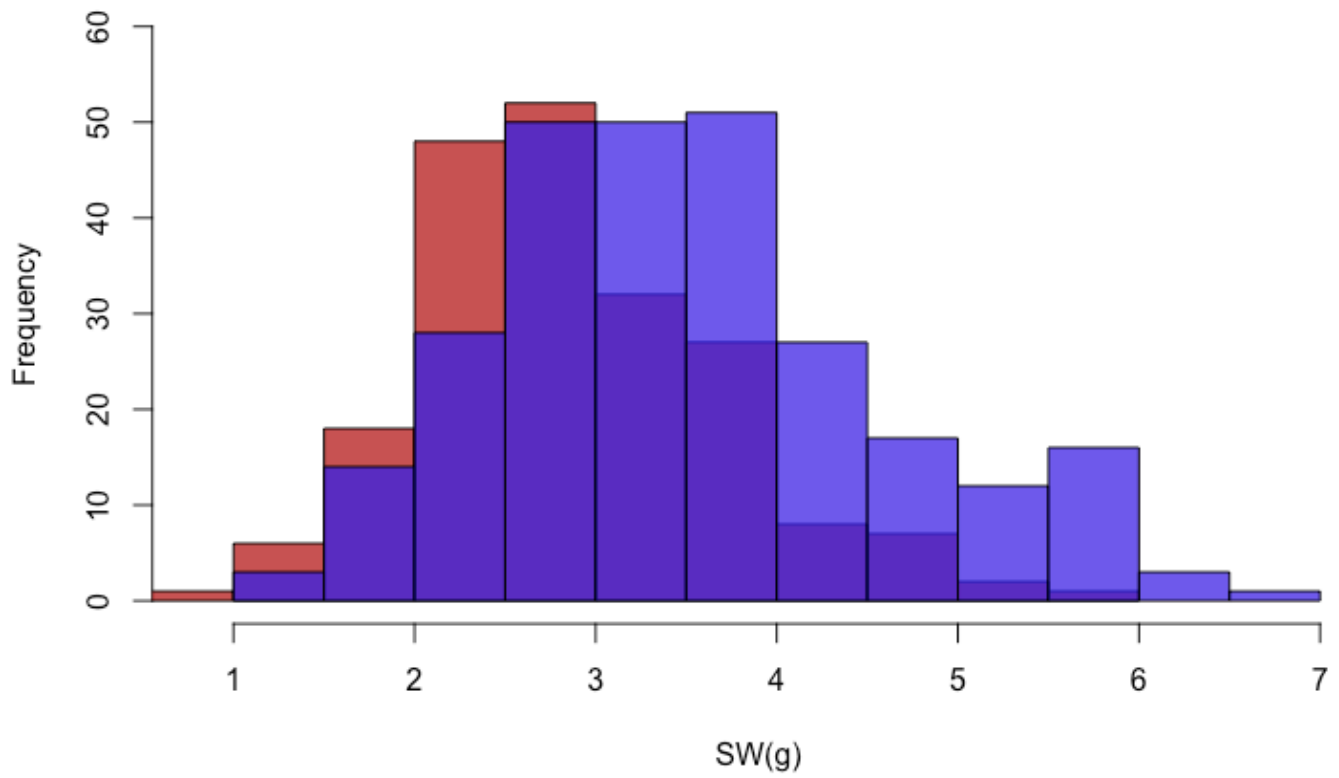

**Histogram for TeW in the lean and fat lines**

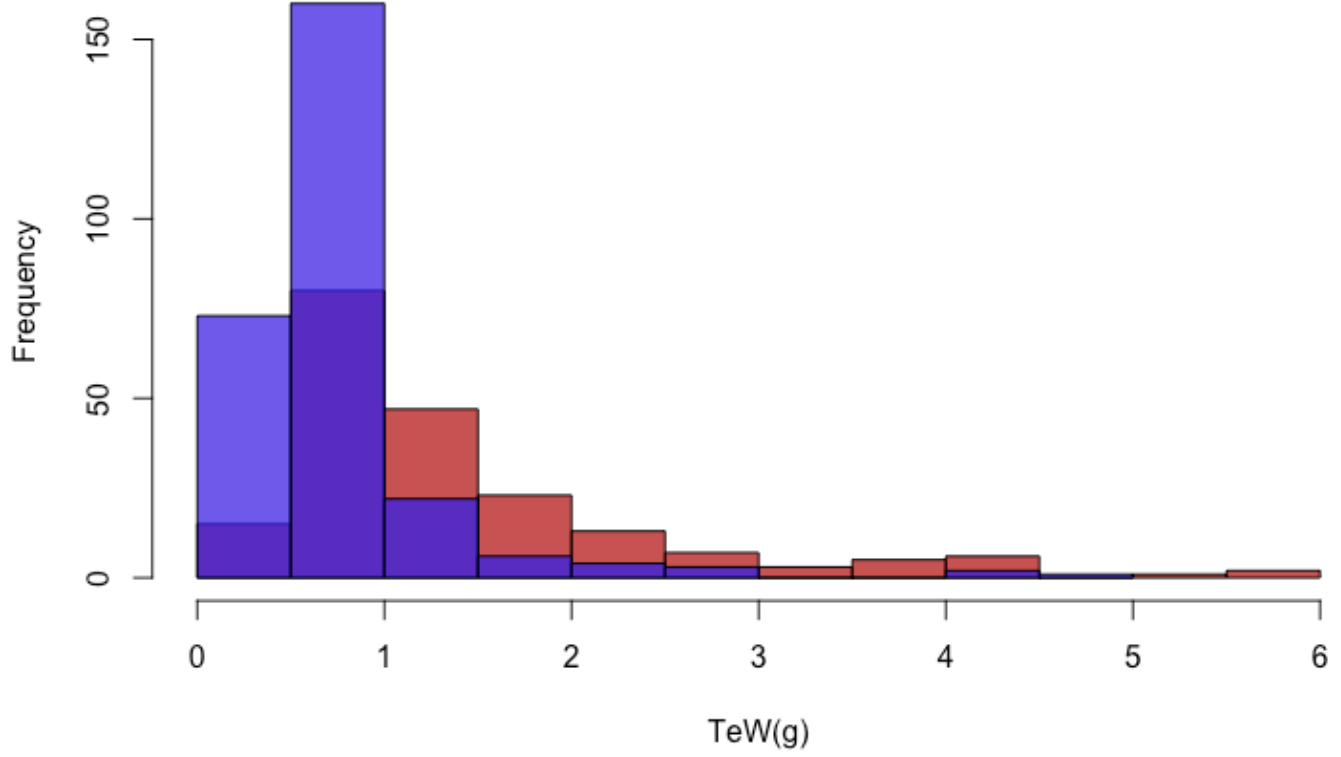

Supplement: 12864_2017_4252_MOESM1_ESM.pdf [file 12864_2017_4252_MOESM1_ESM.pdf]
