# Supplementary material for: Identification of genome-wide SNP-SNP interactions associated with important traits in chicken
Source: PubMed Central journal article supplement (PMC5698929; doi:10.1186/s12864-017-4252-y), 2017-11-21

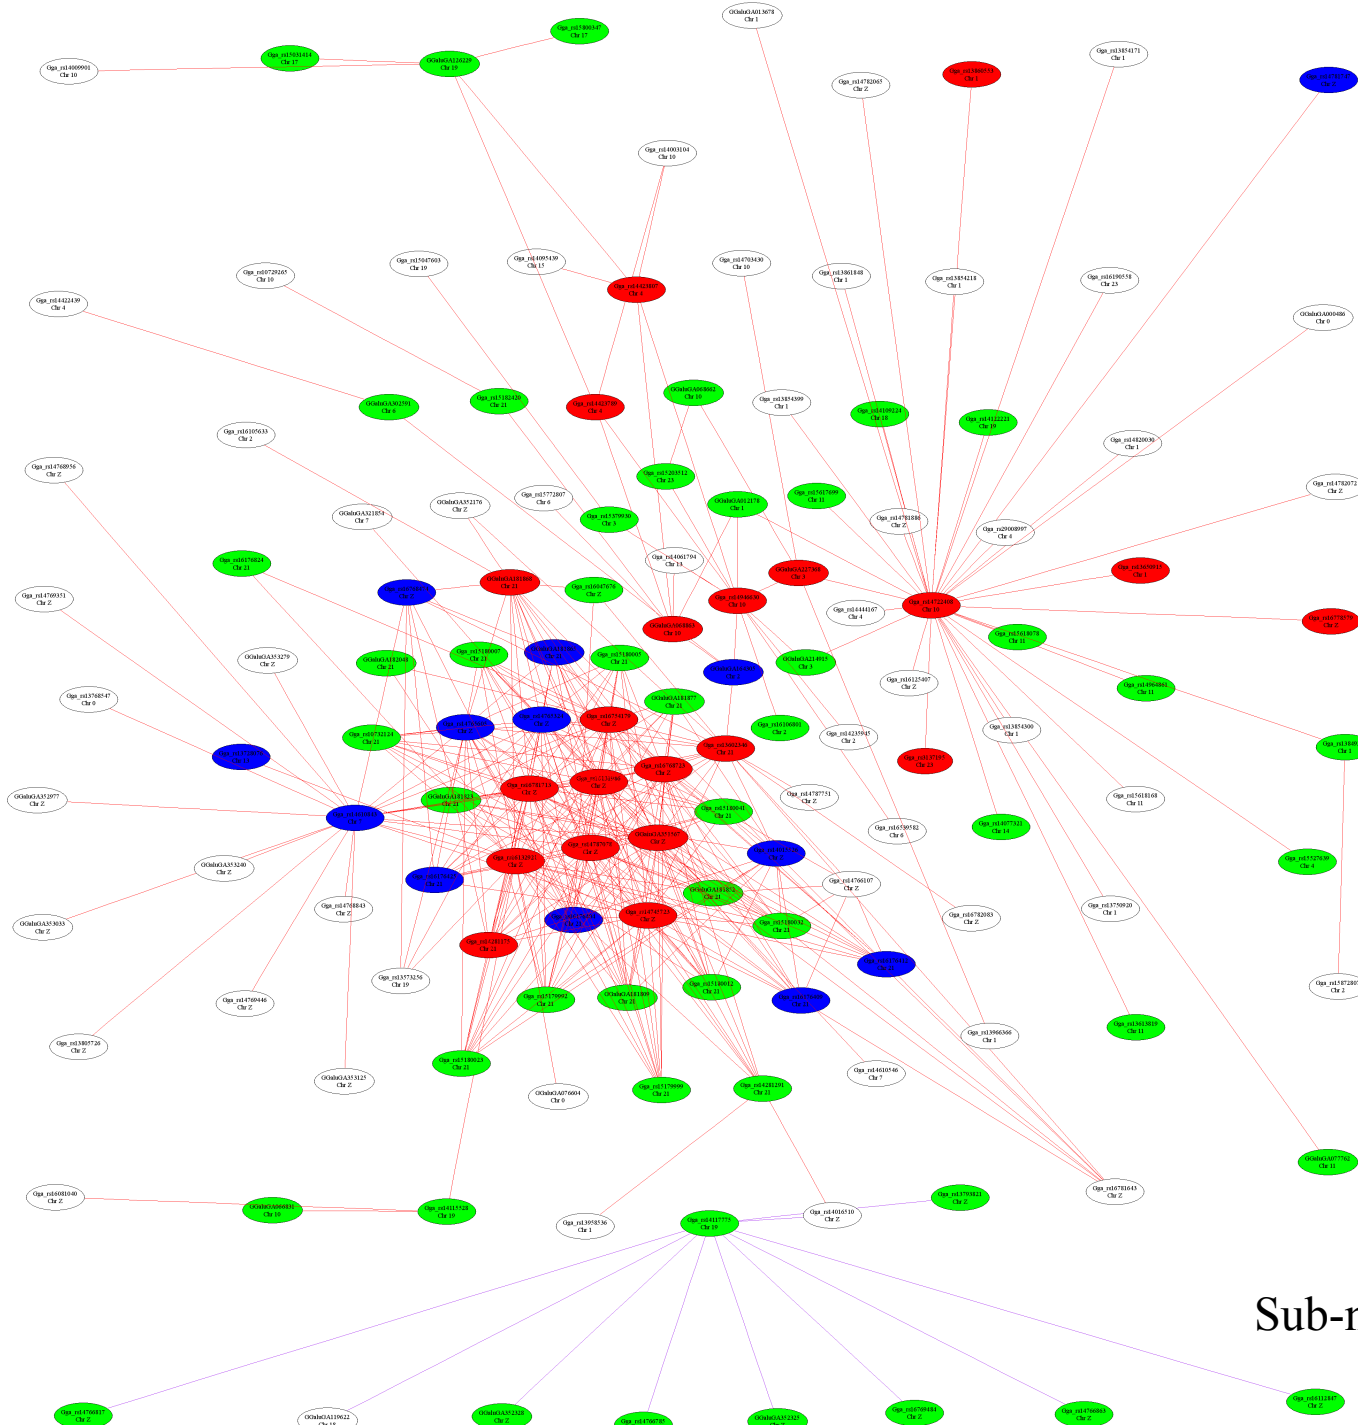

Sub-network1

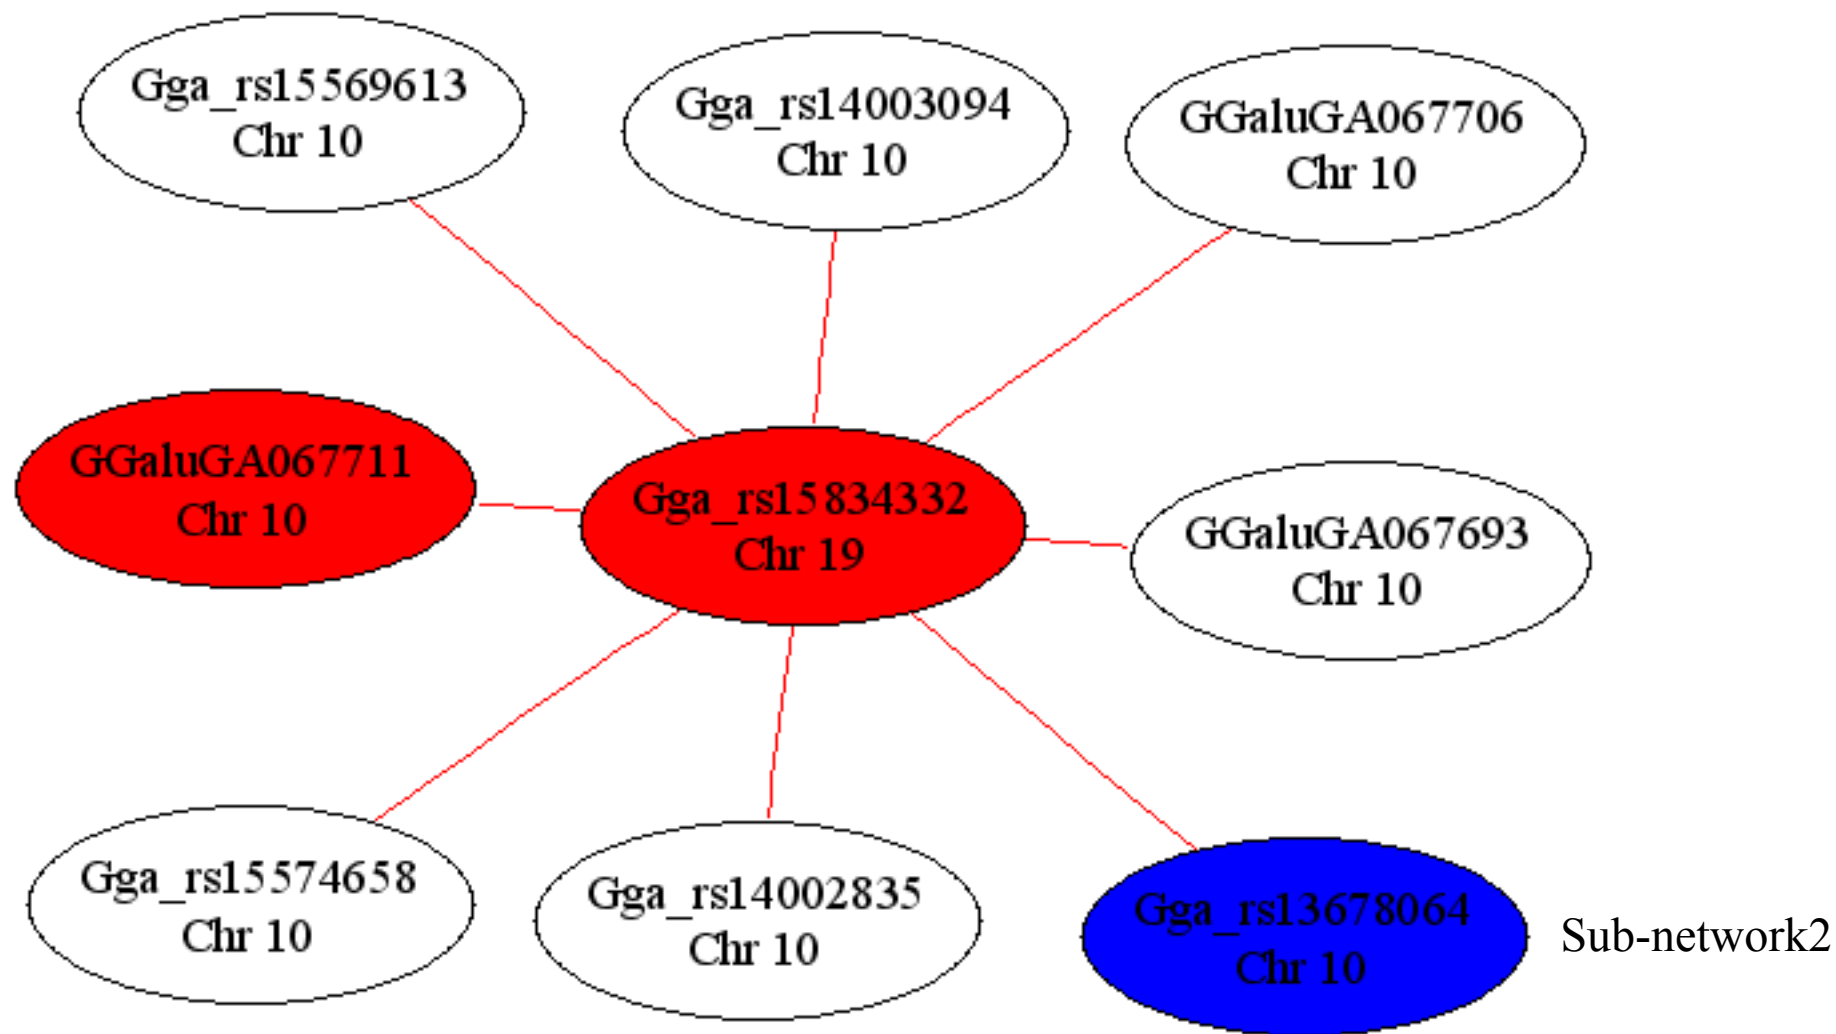

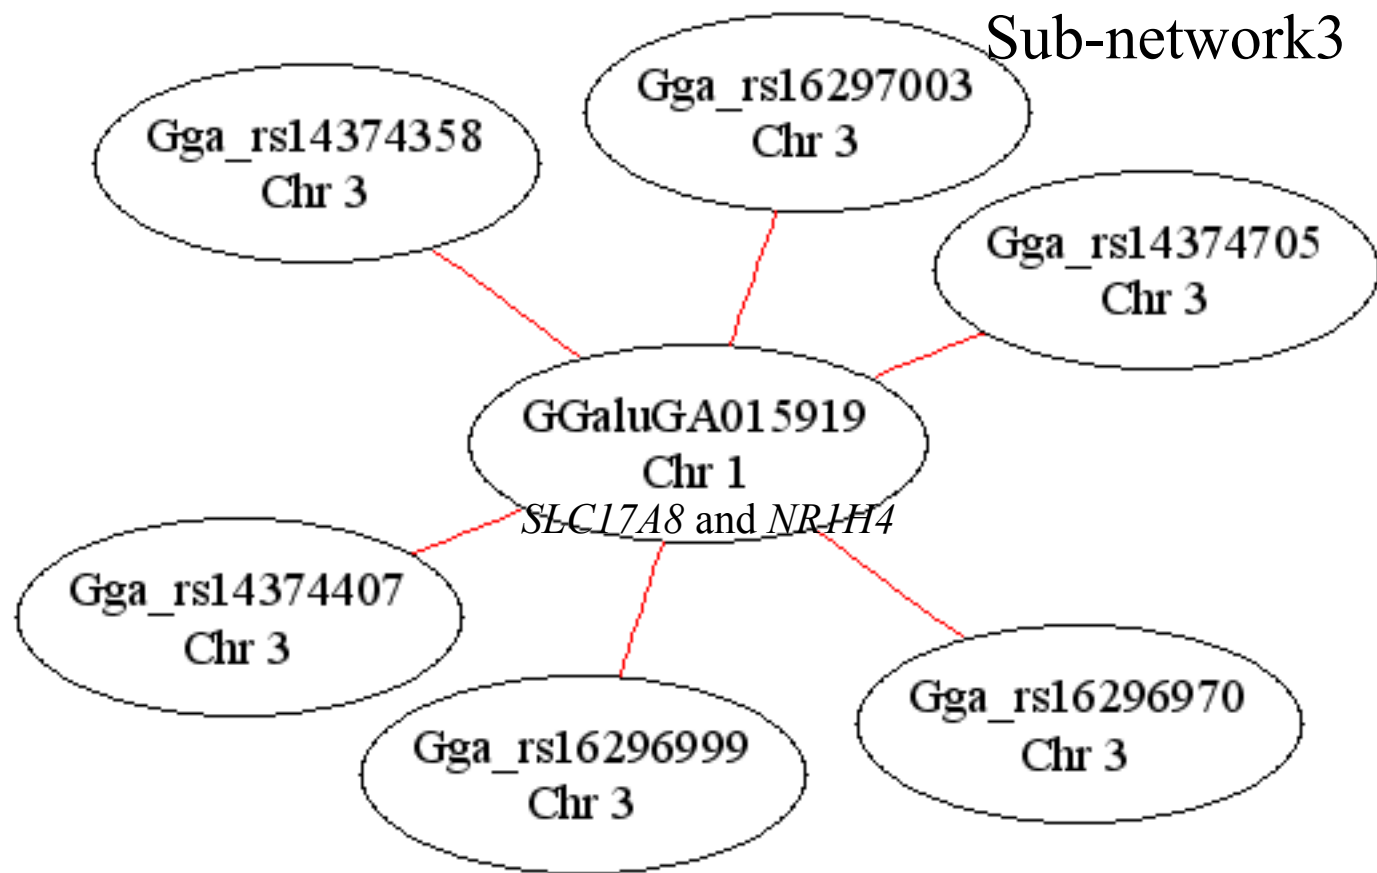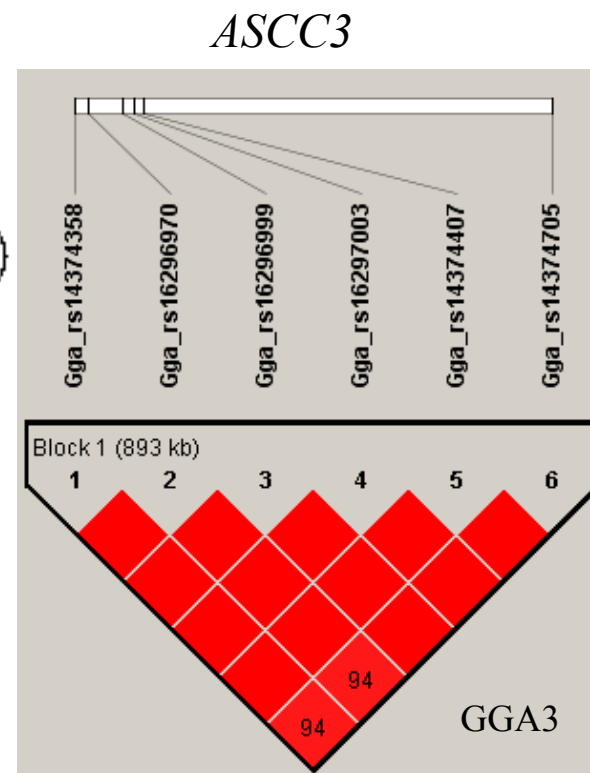

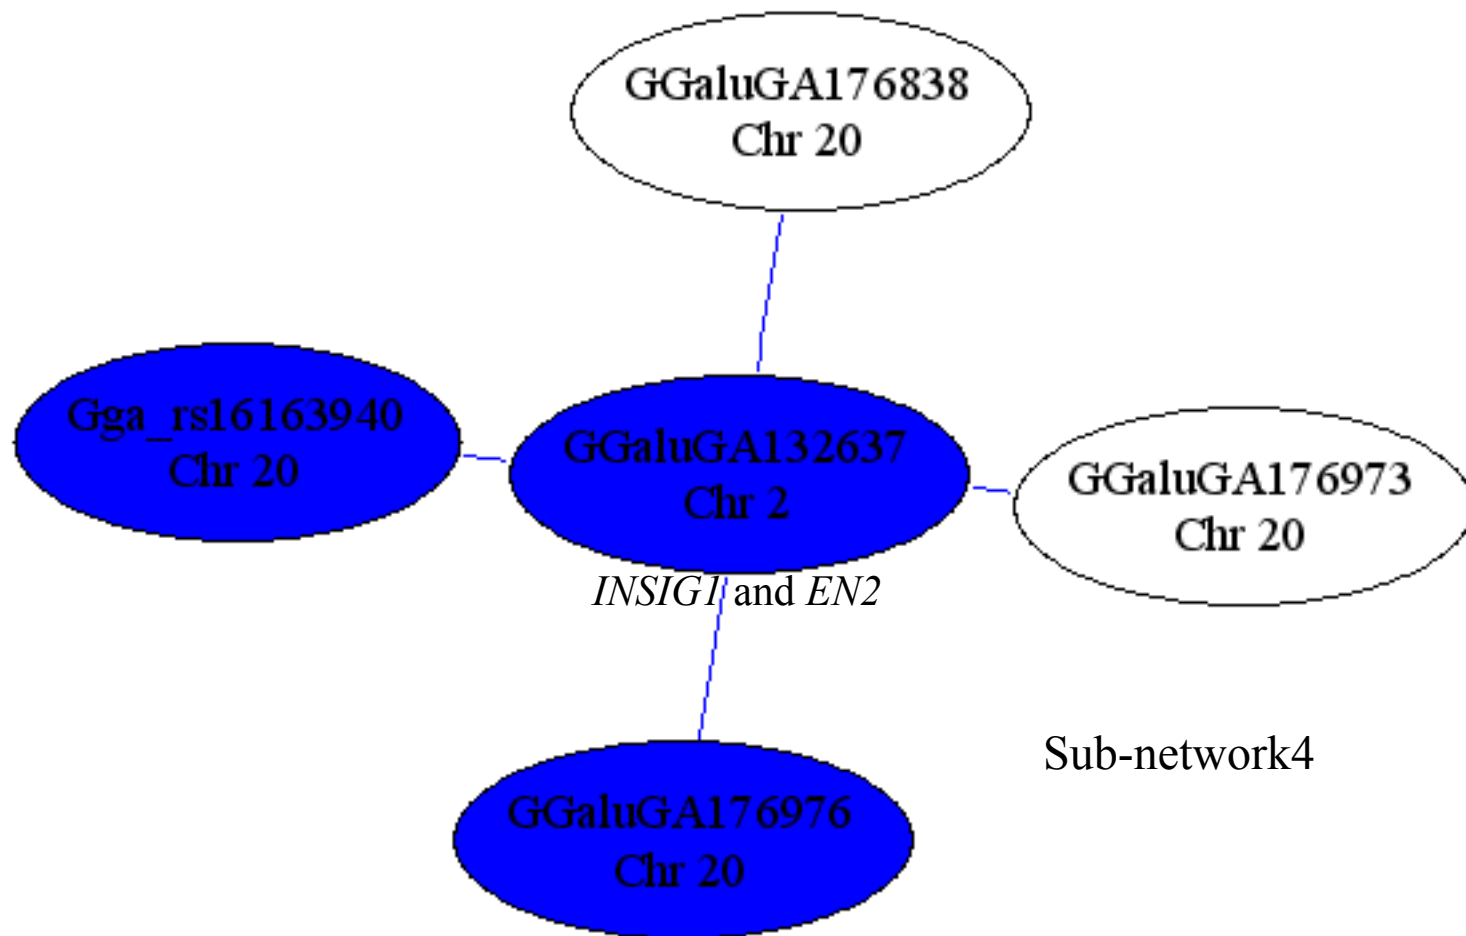

No Refgenes in the LD block

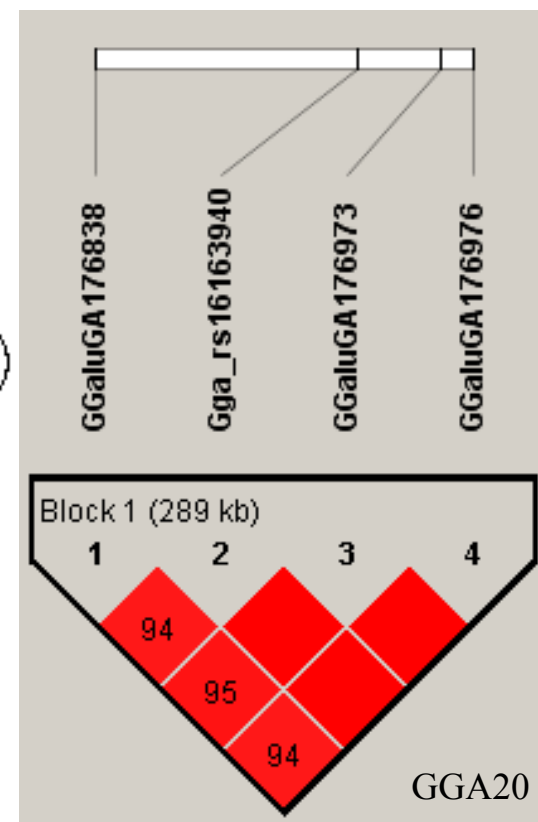

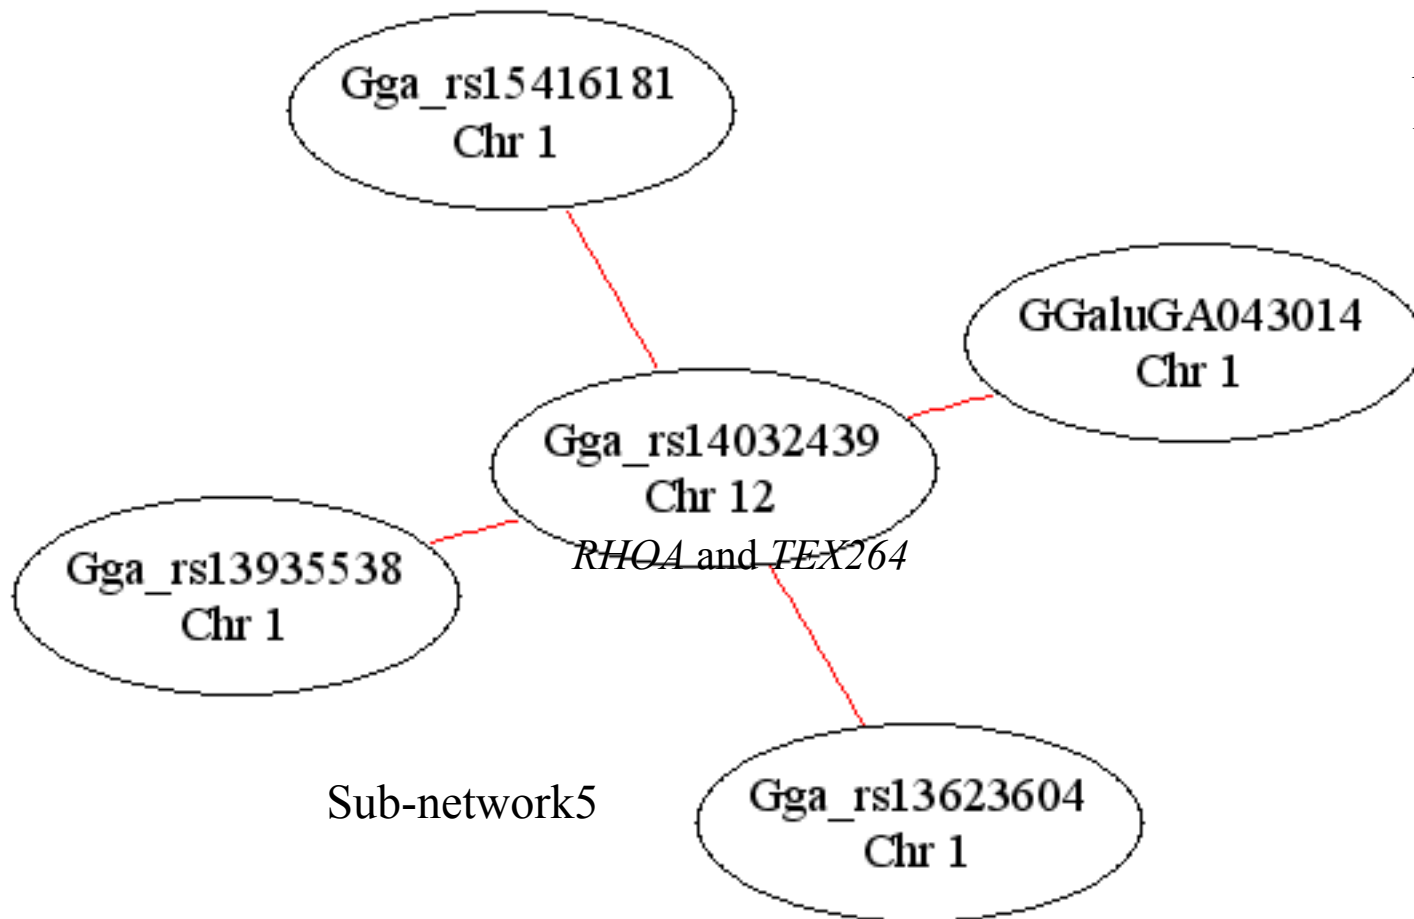

*ANOS1, MIR7448, PNPLA4,  
NLGN4X, MIR1397, ARSH, CD99*

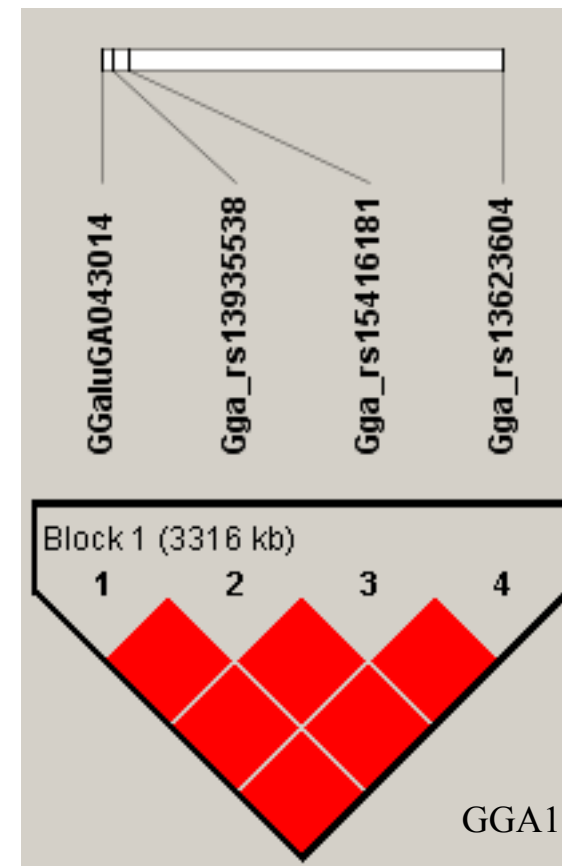

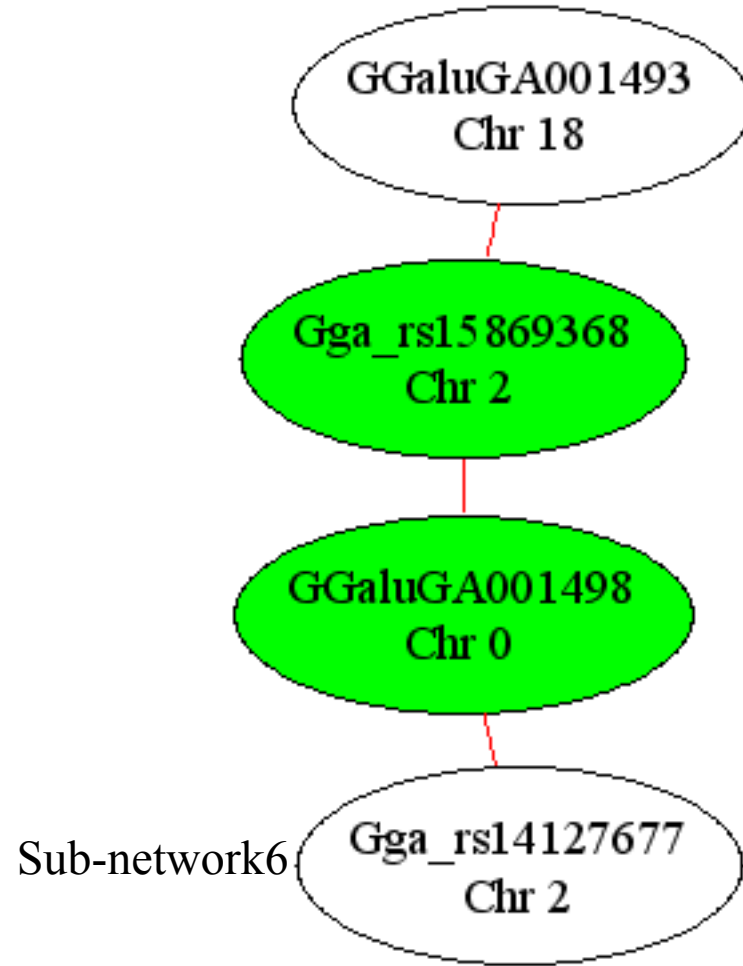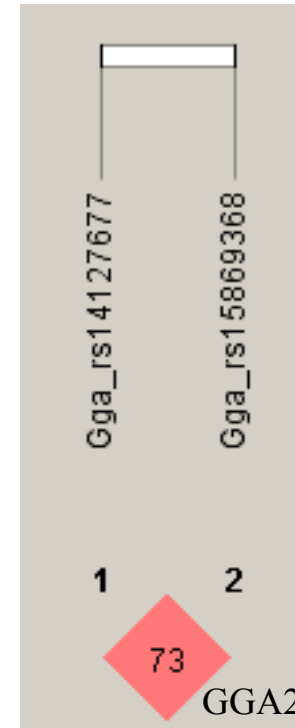

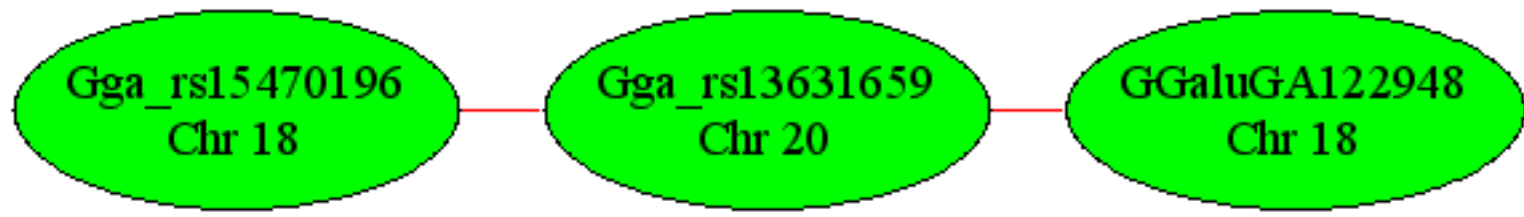

Sub-network7

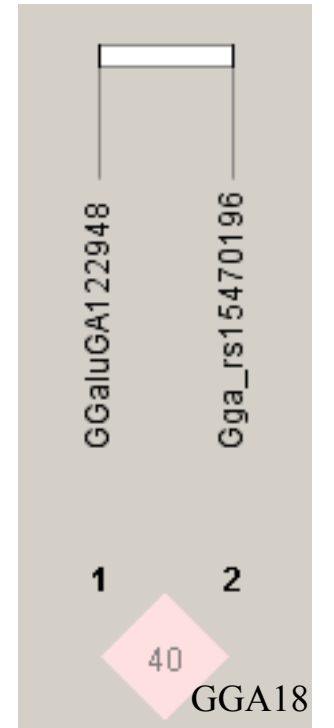

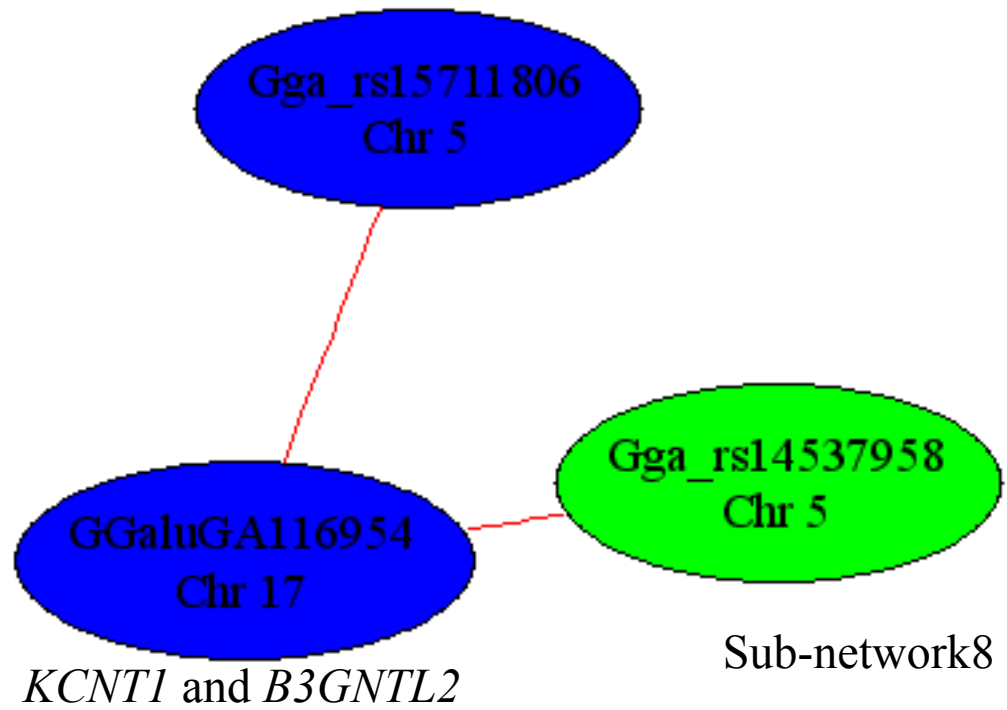

No Refgenes in the LD block

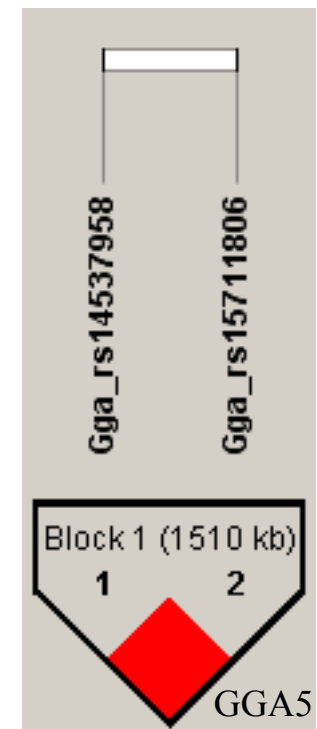



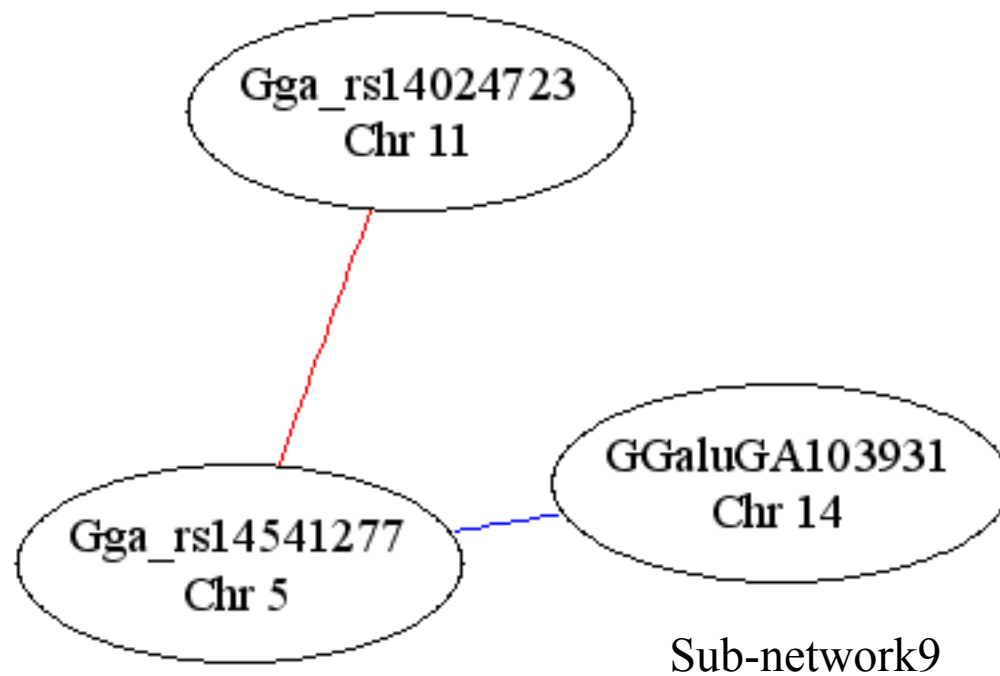

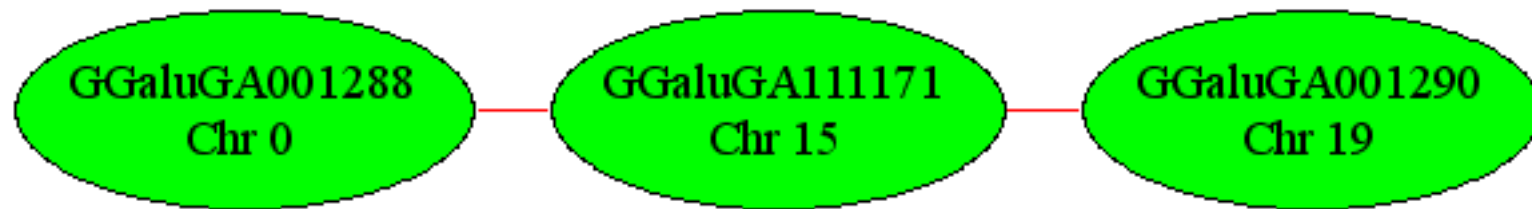

Sub-network10

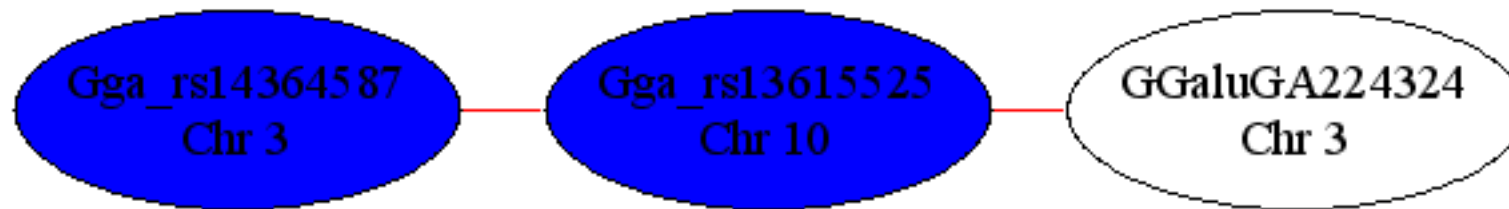

*C10H15ORF59 and MIR6625*

Sub-network11

No Refgenes in the LD block

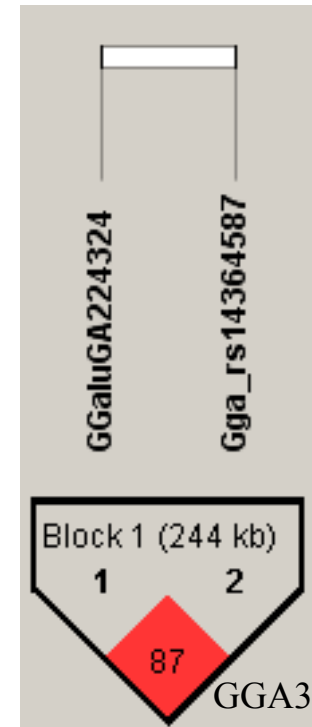

Supplement: 12864_2017_4252_MOESM4_ESM.pdf [file 12864_2017_4252_MOESM4_ESM.pdf]
