# Supplementary material for: Identification of genome-wide SNP-SNP interactions associated with important traits in chicken
Source: PubMed Central journal article supplement (PMC5698929; doi:10.1186/s12864-017-4252-y), 2017-11-21

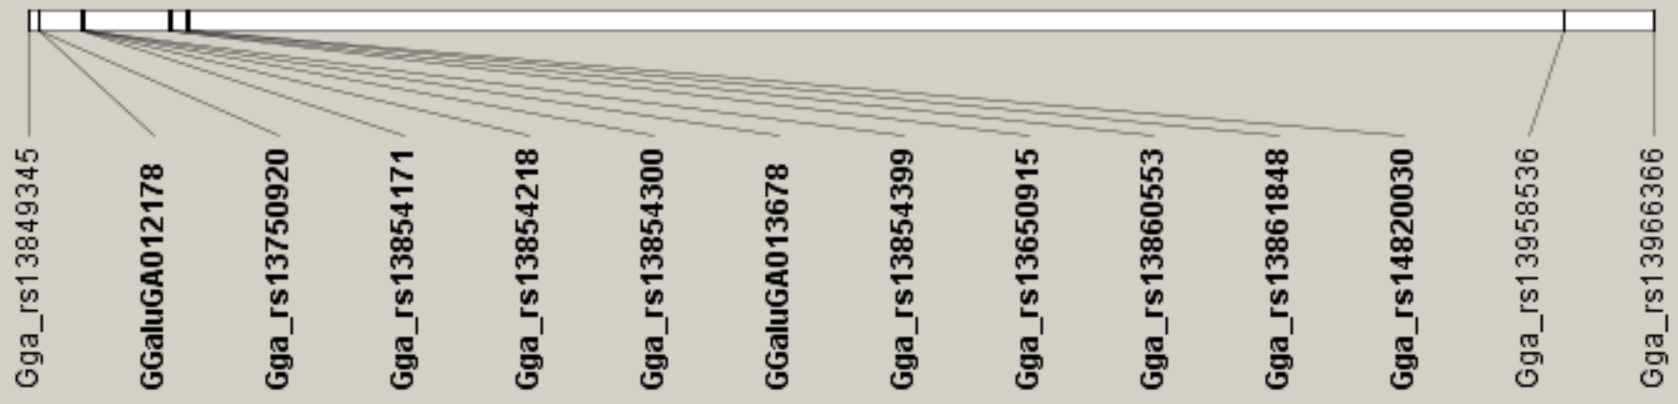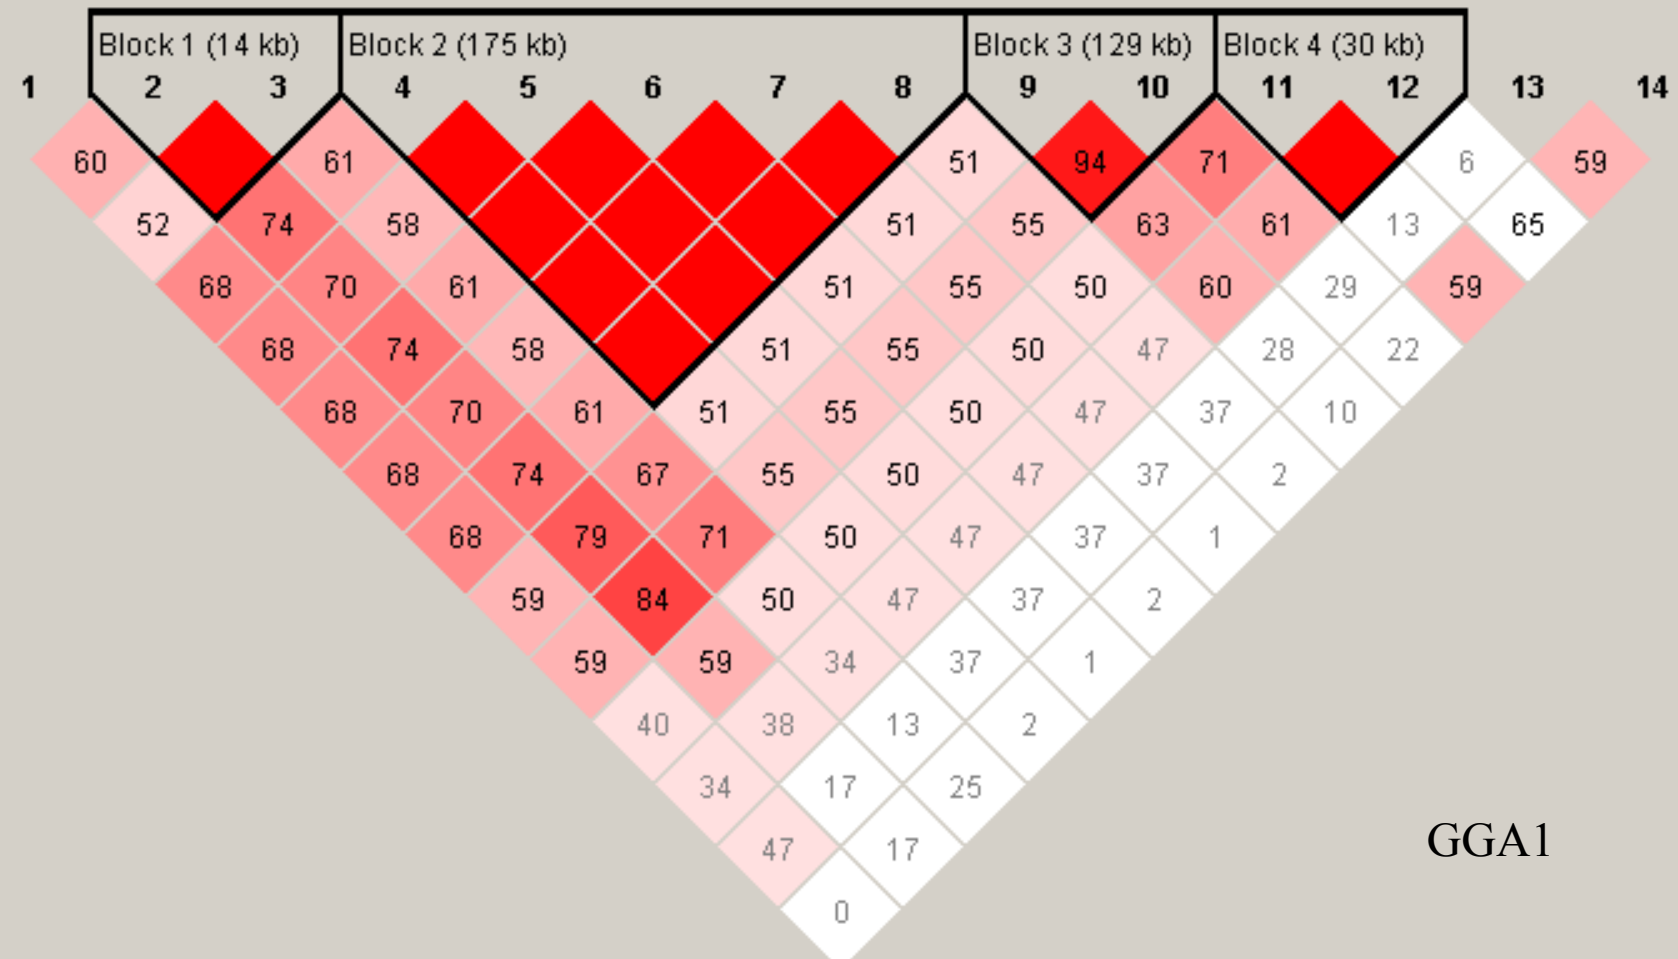

GGA1

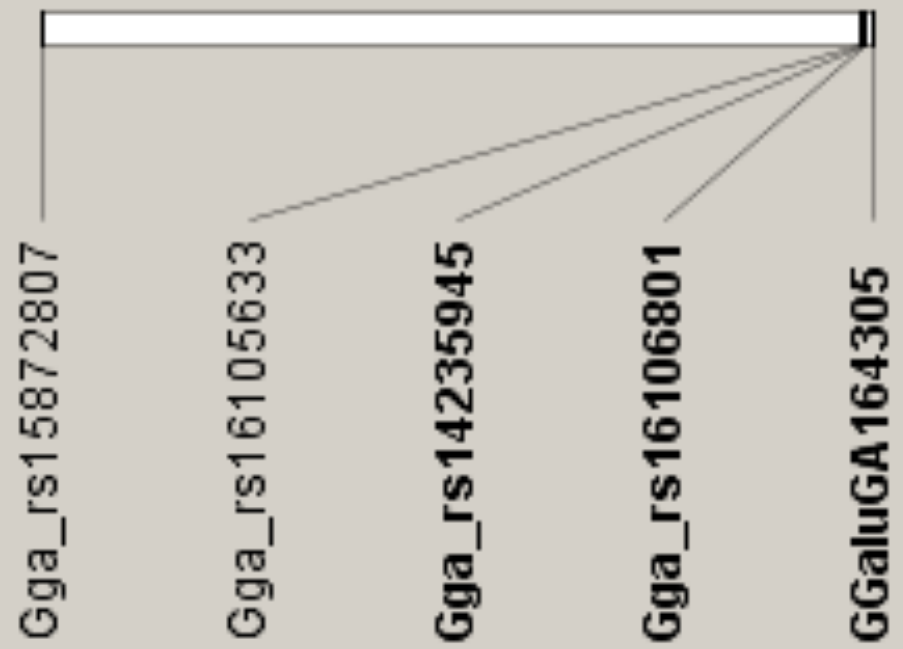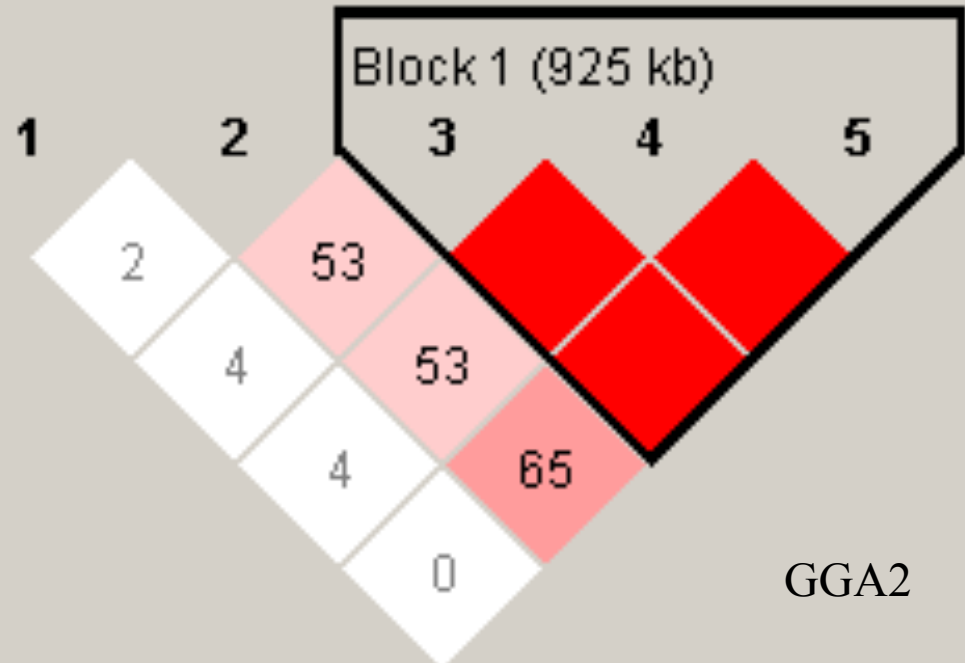

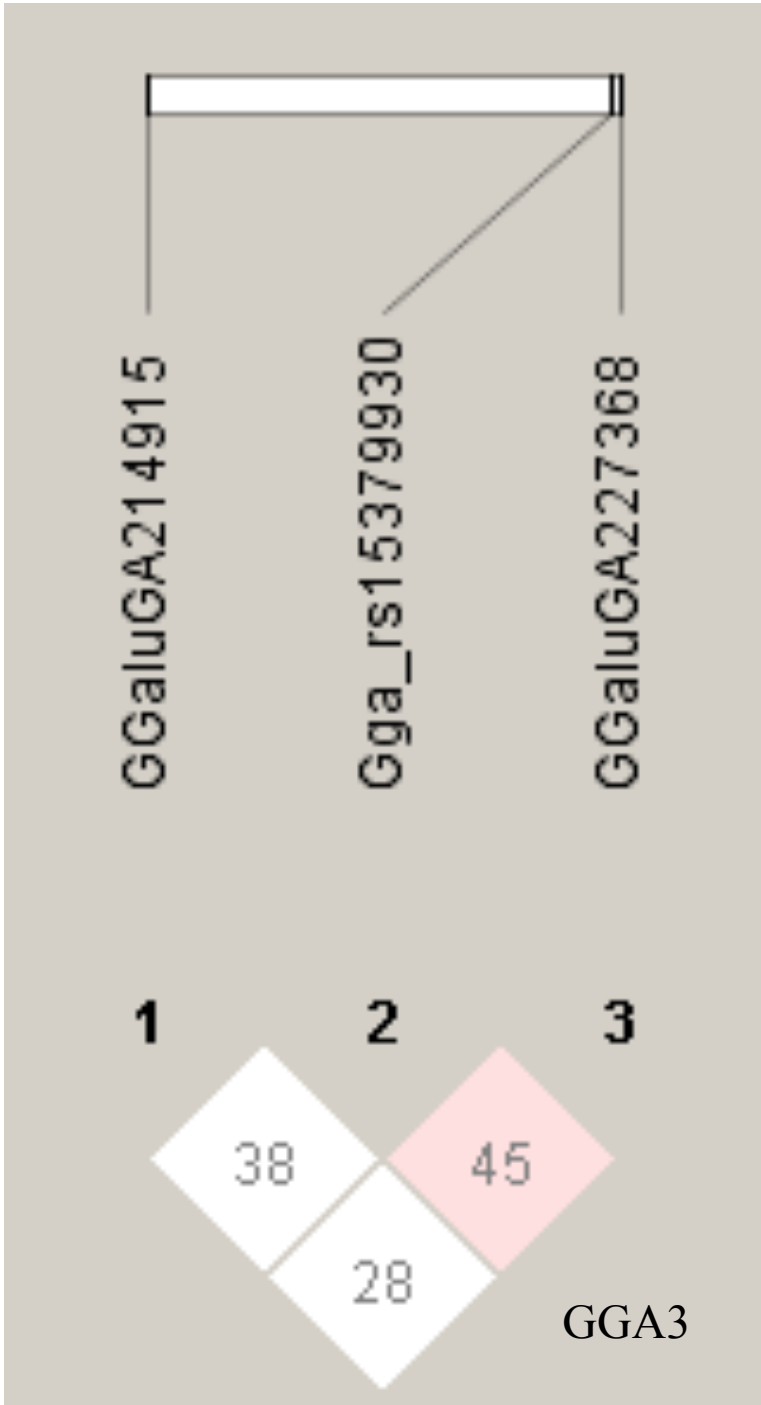

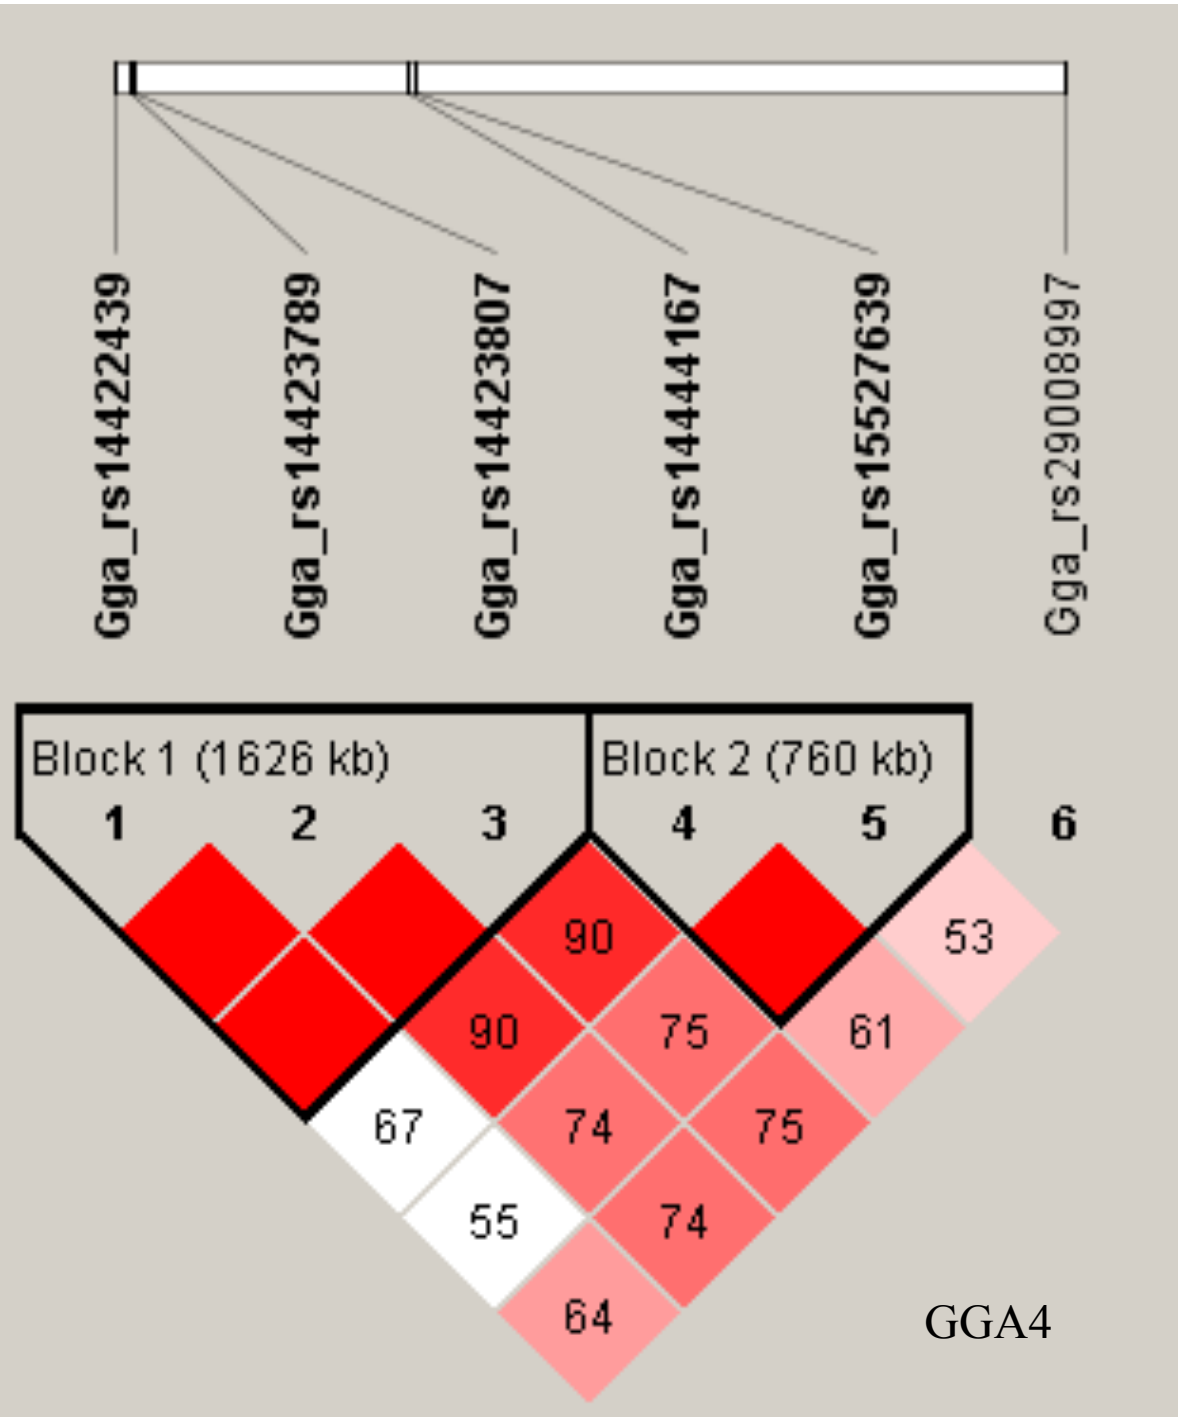

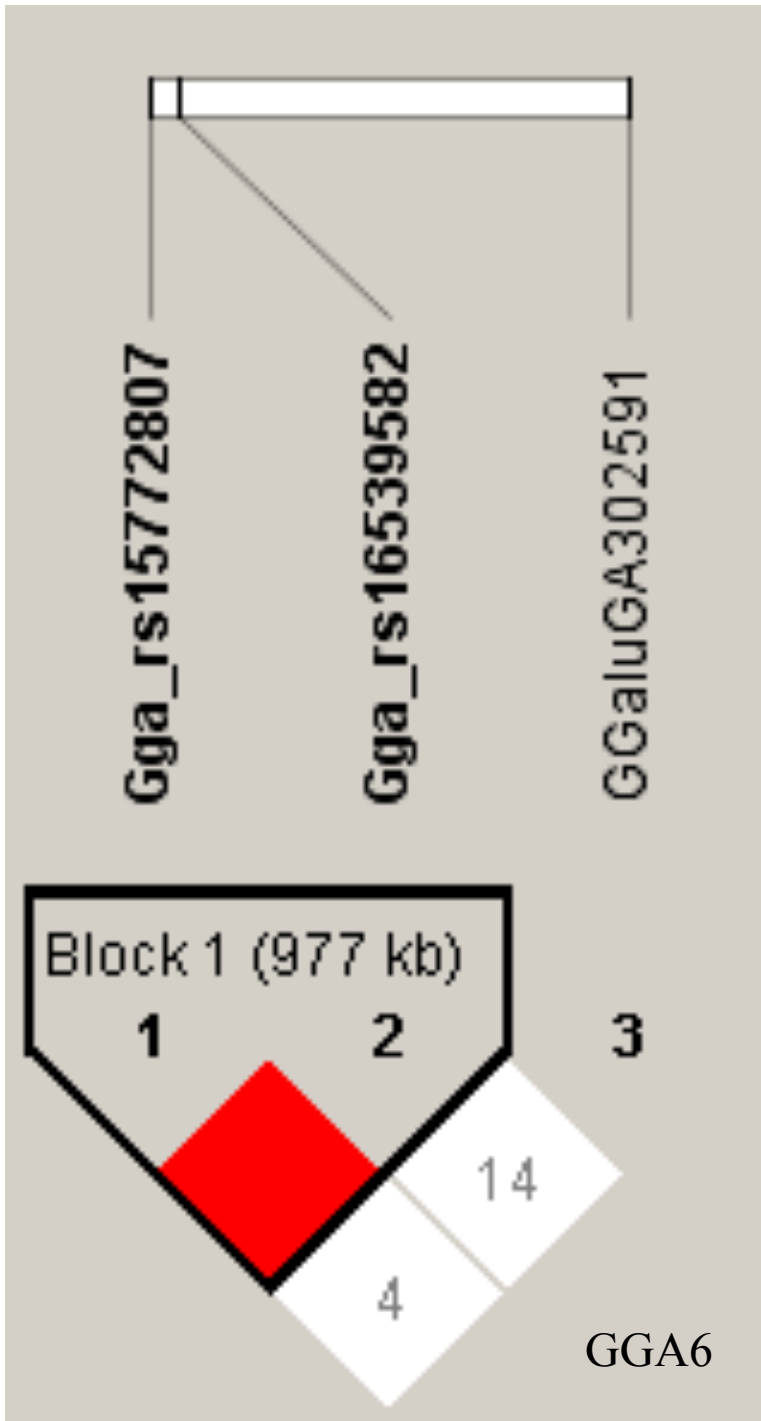

Gga\_rs14610546

**1**

Gga\_rs14610843

**2**

70

GGA7

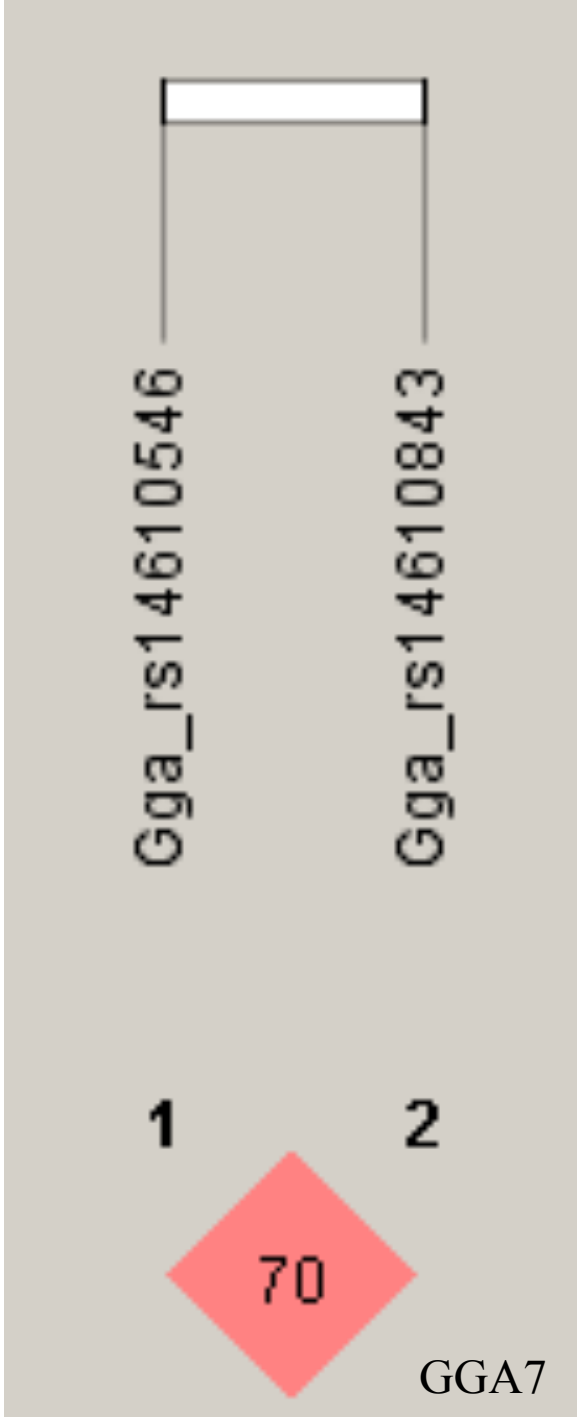

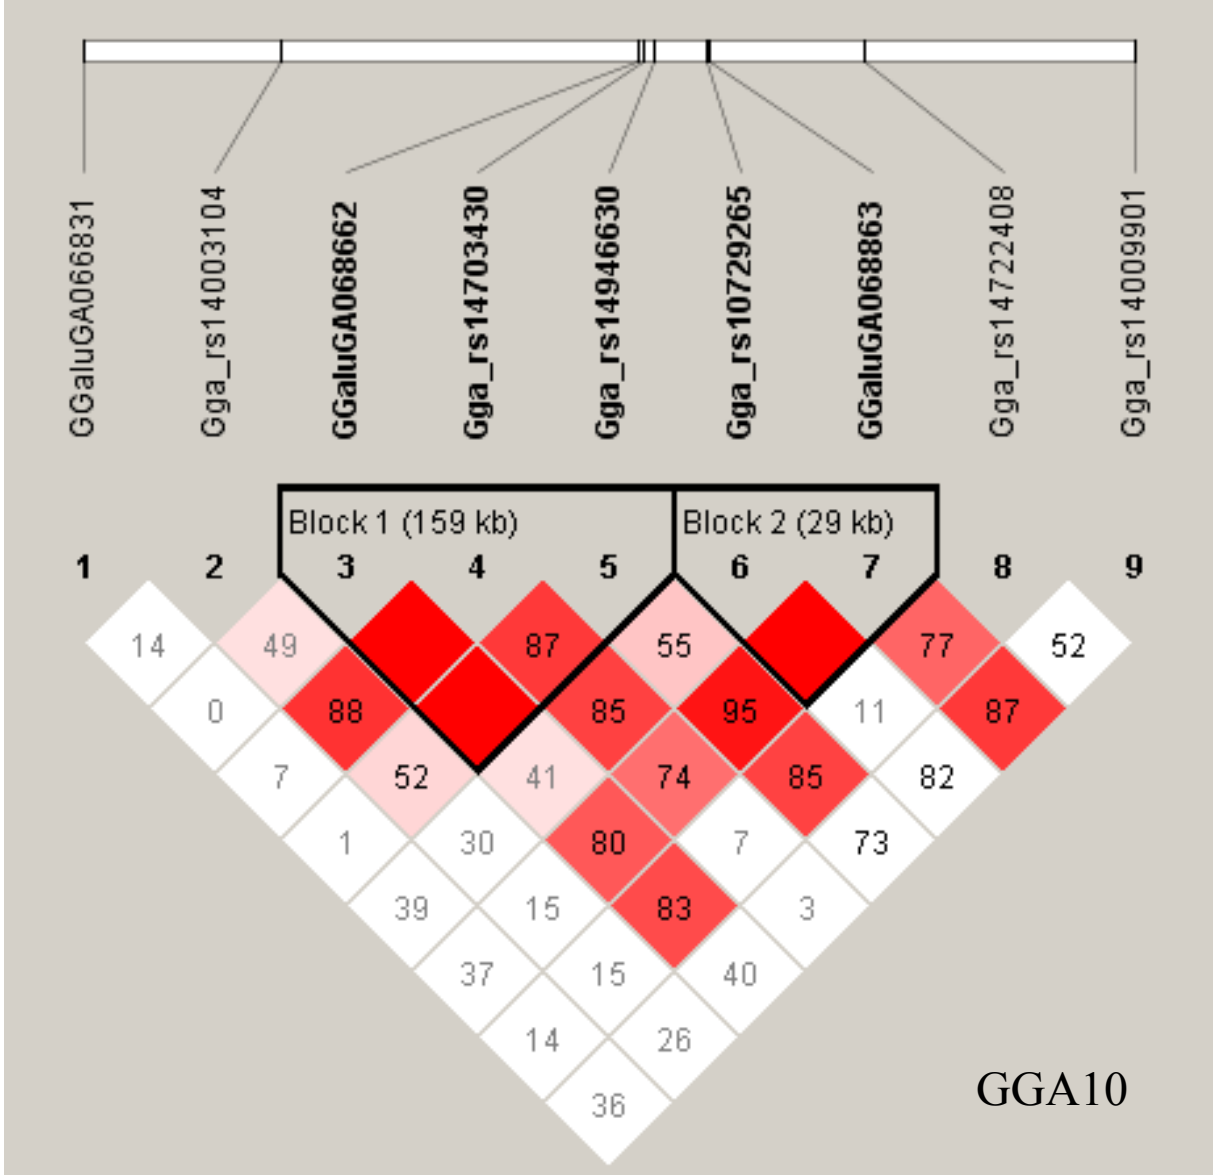

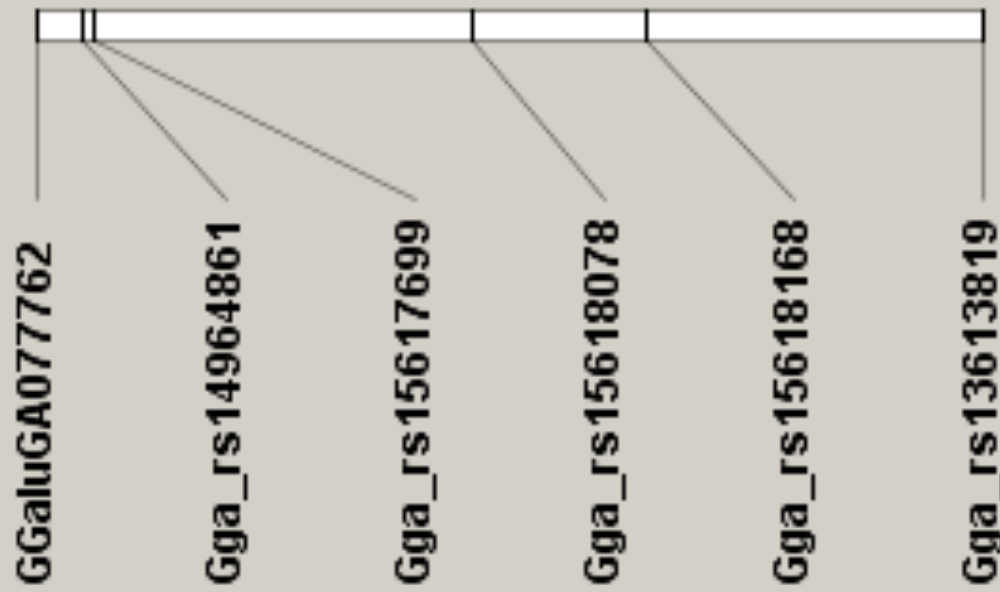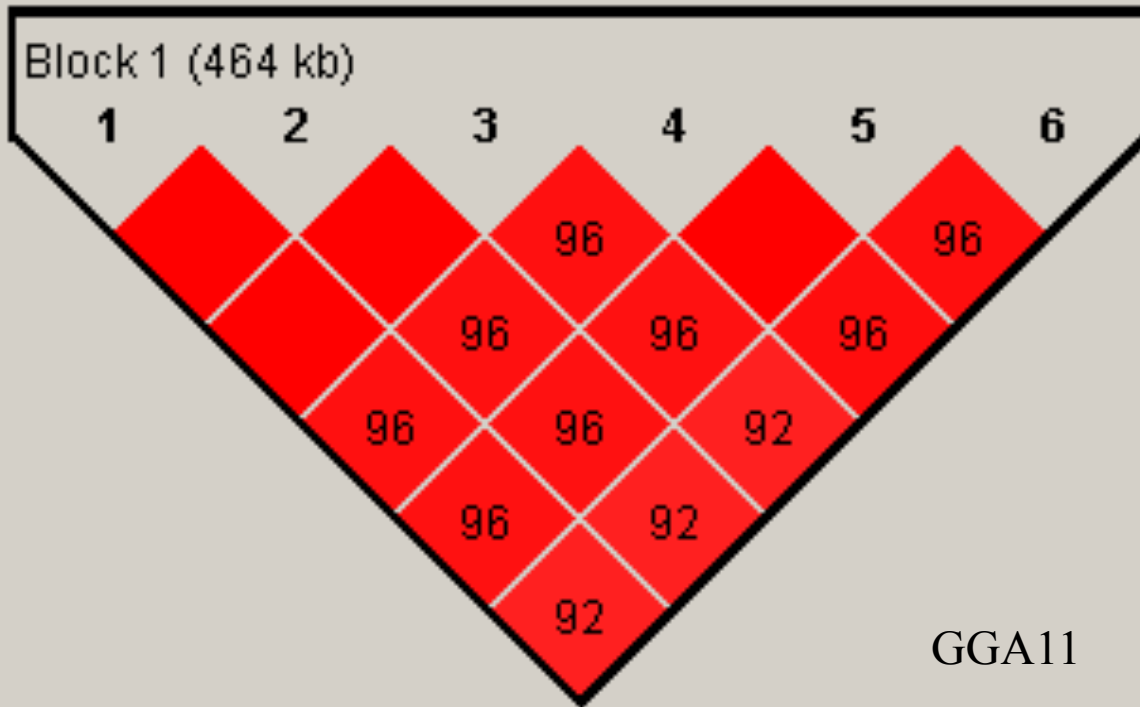



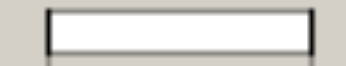

Gga\_rs13728076

Gga\_rs14061794

**1**

**2**

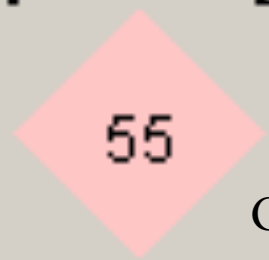

55

GGA13

Gga\_rs15800347

Gga\_rs15031414

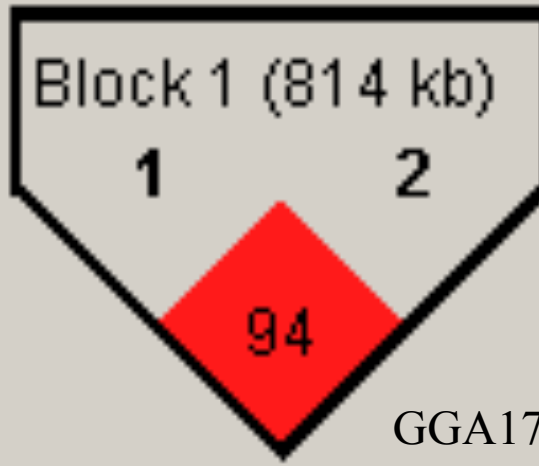

GGA17

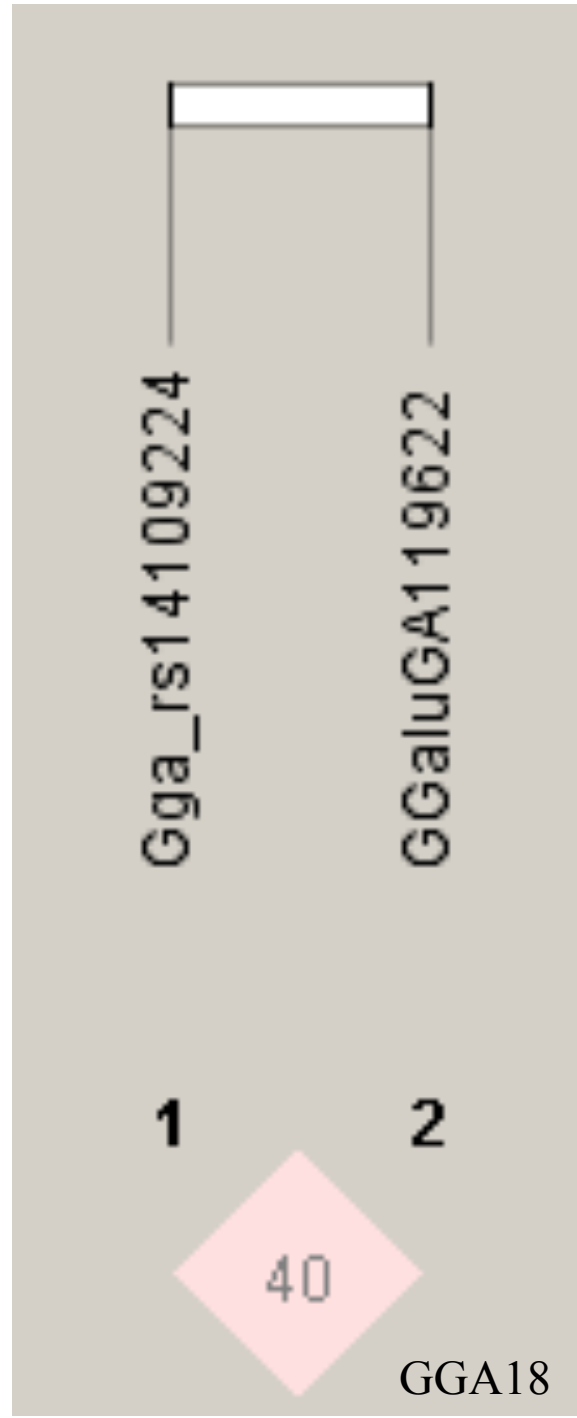

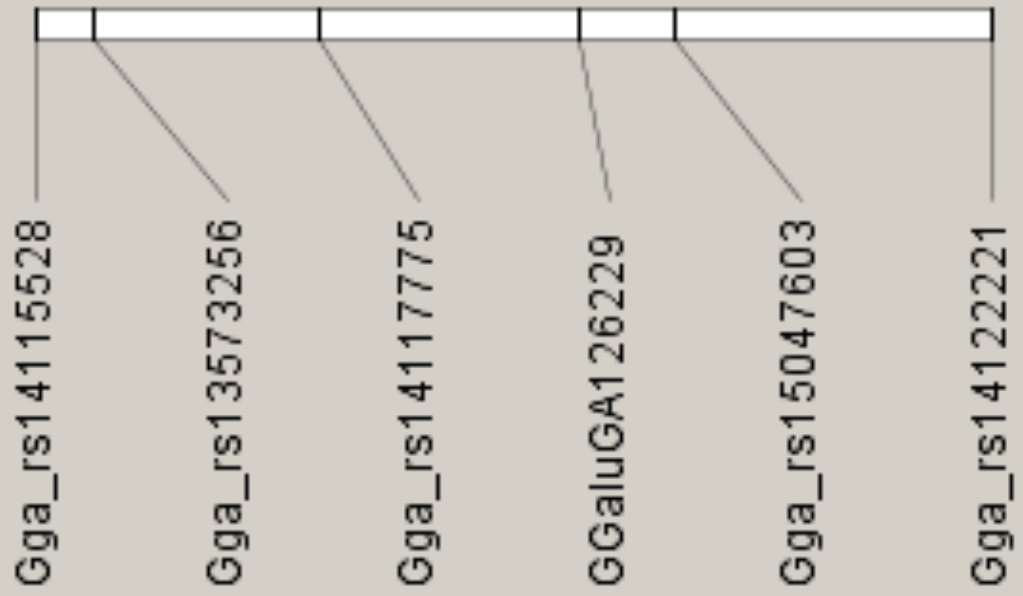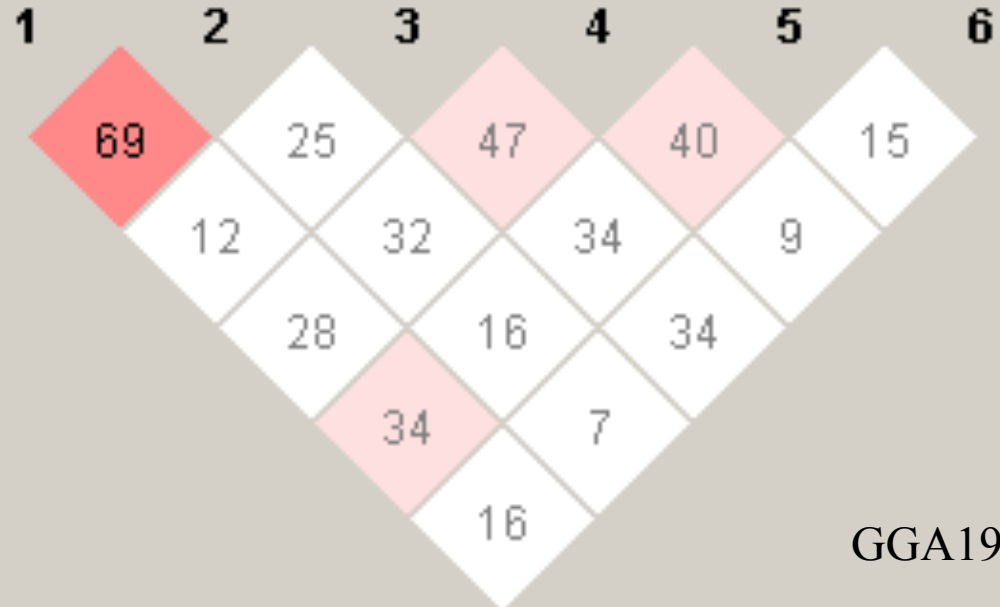

GGA19



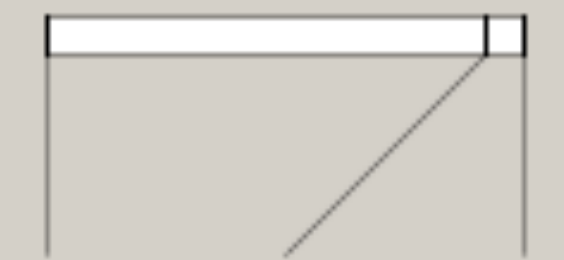

Gga\_rs3137195

Gga\_rs15203512

Gga\_rs16190558

**1**

**2**

**3**

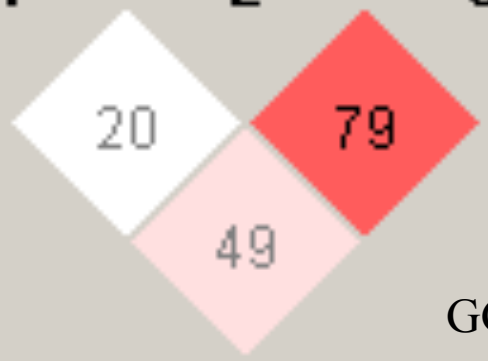

GGA23

Gga\_rs10081040 Gga\_rs14765324 Gga\_rs16768474 Gga\_rs14765605 Gga\_rs16768723 Gga\_rs14766107 GGalUGA351567 Gga\_rs16047676 Gga\_rs16761643 Gga\_rs14745723 Gga\_rs16131986 Gga\_rs14787078 Gga\_rs16781713 Gga\_rs14787751 Gga\_rs16782083 Gga\_rs16754179 Gga\_rs16132921 Gga\_rs14015526 GGalUGA352176 GGalUGA352325 GGalUGA352328 Gga\_rs14016510 Gga\_rs16112847 Gga\_rs14766863 Gga\_rs14766817 Gga\_rs14766785 Gga\_rs13793821 Gga\_rs16769484 GGalUGA352977 Gga\_rs13805726 GGalUGA353033 Gga\_rs14768843 GGalUGA353125 Gga\_rs14768956 GGalUGA353240 Gga\_rs14769351 GGalUGA353279 Gga\_rs14769446 Gga\_rs16125407 Gga\_rs14781747 Gga\_rs14781886 Gga\_rs16778579 Gga\_rs14782065 Gga\_rs14782072

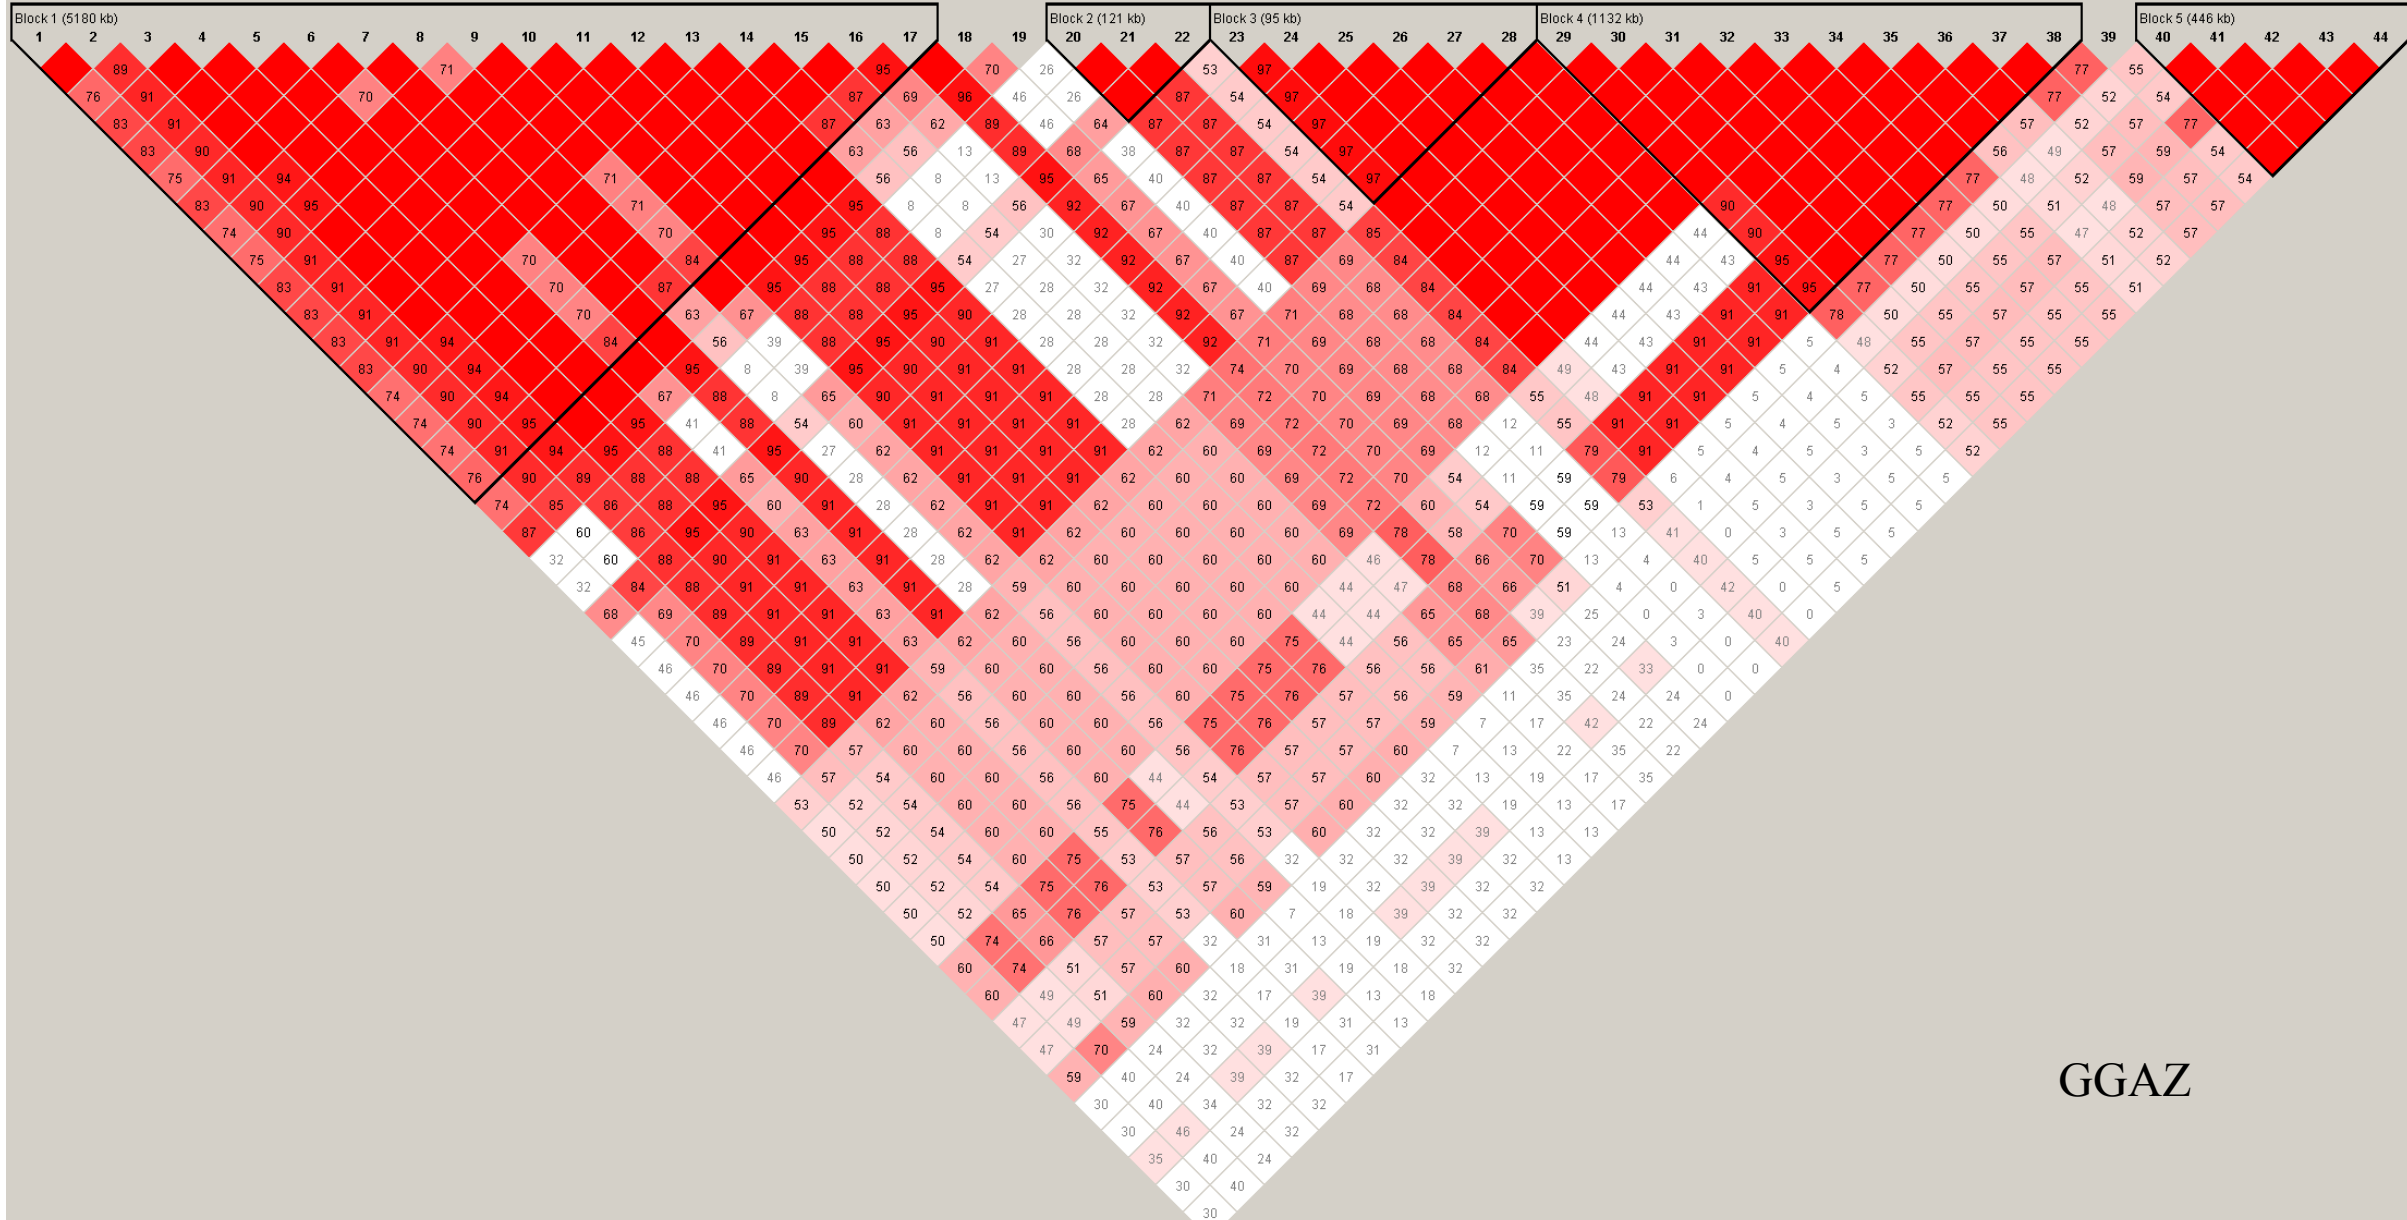

Supplement: 12864_2017_4252_MOESM5_ESM.pdf [file 12864_2017_4252_MOESM5_ESM.pdf]
