# Supplementary material for: Identification of genome-wide SNP-SNP interactions associated with important traits in chicken
Source: PubMed Central journal article supplement (PMC5698929; doi:10.1186/s12864-017-4252-y), 2017-11-21

**Histogram for TeW in different genotype classes**

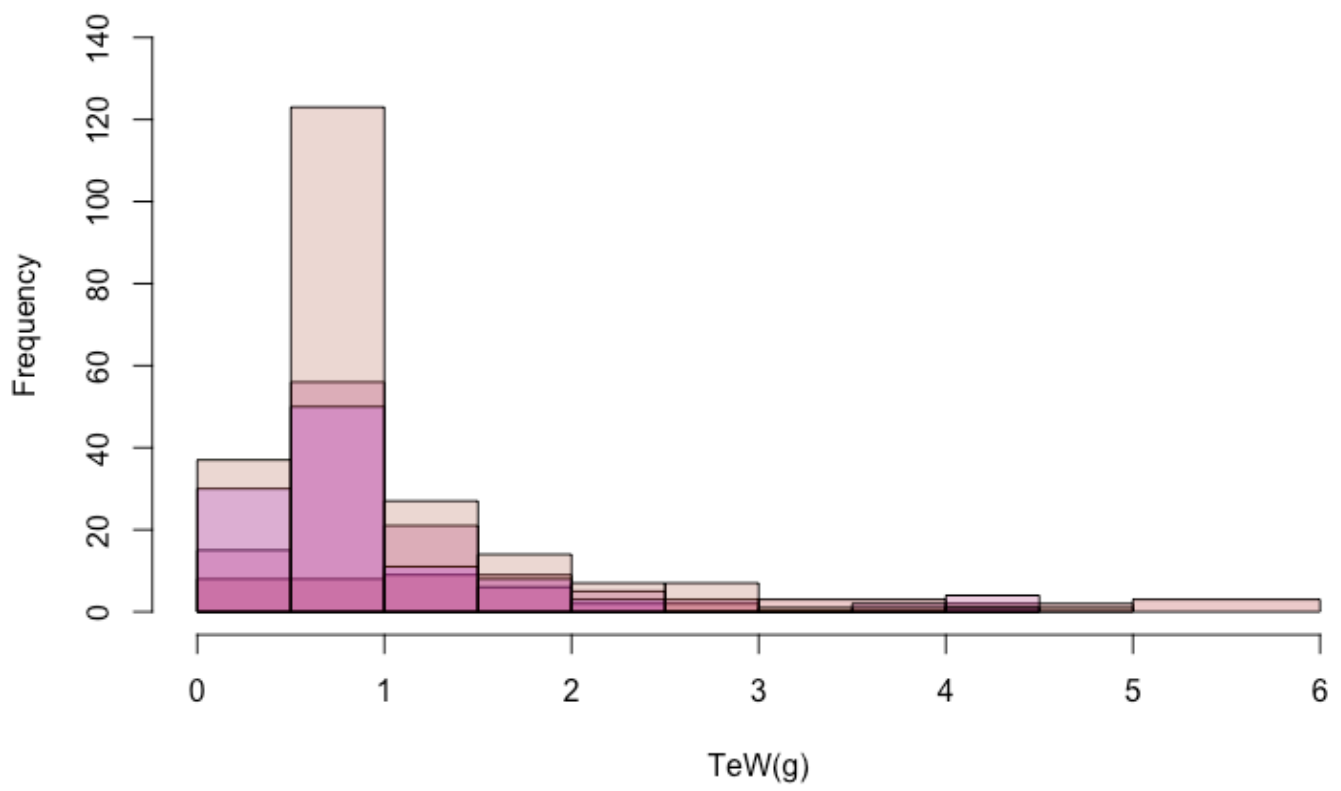

**Histogram of First\_genotype\_class\$TeW**

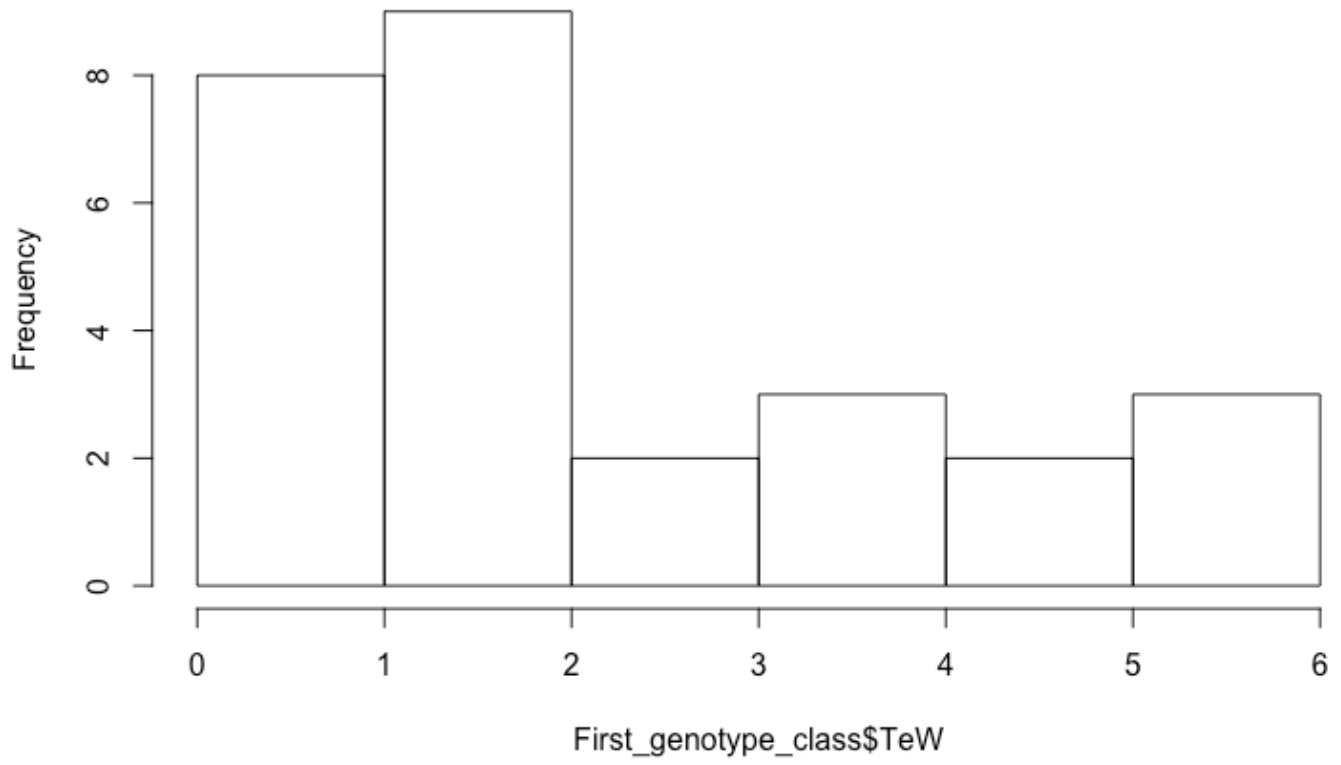

**Histogram of Second\_genotype\_class\$TeW**

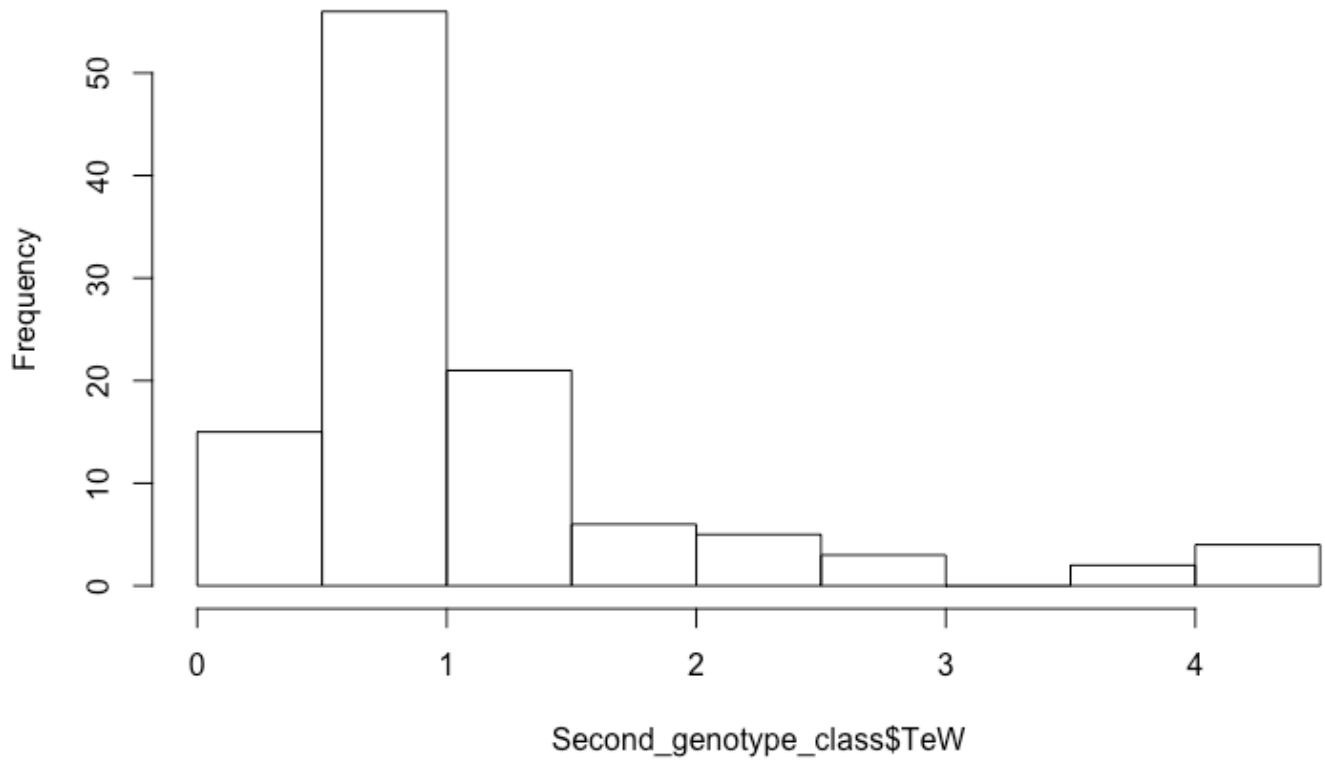

**Histogram of Third\_genotype\_class\$TeW**

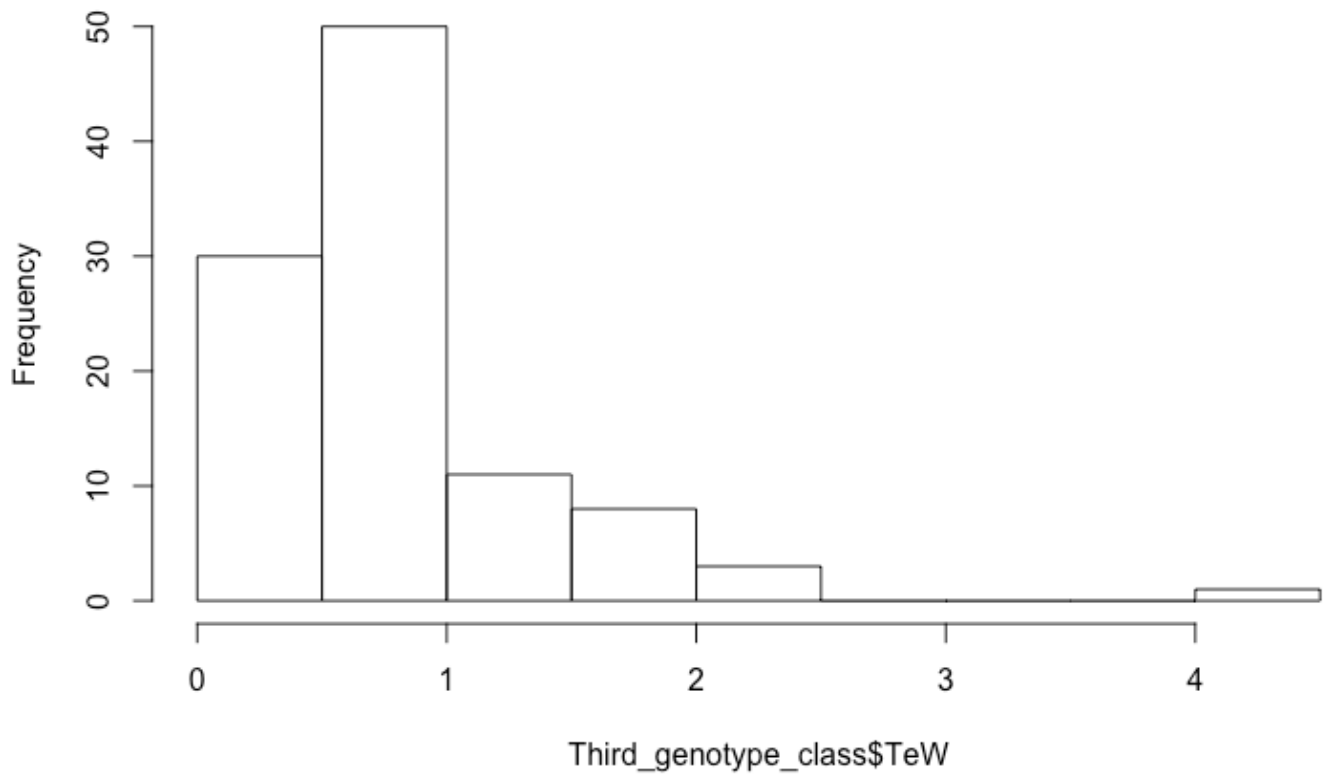

**Histogram of Fourth\_genotype\_class\$TeW**

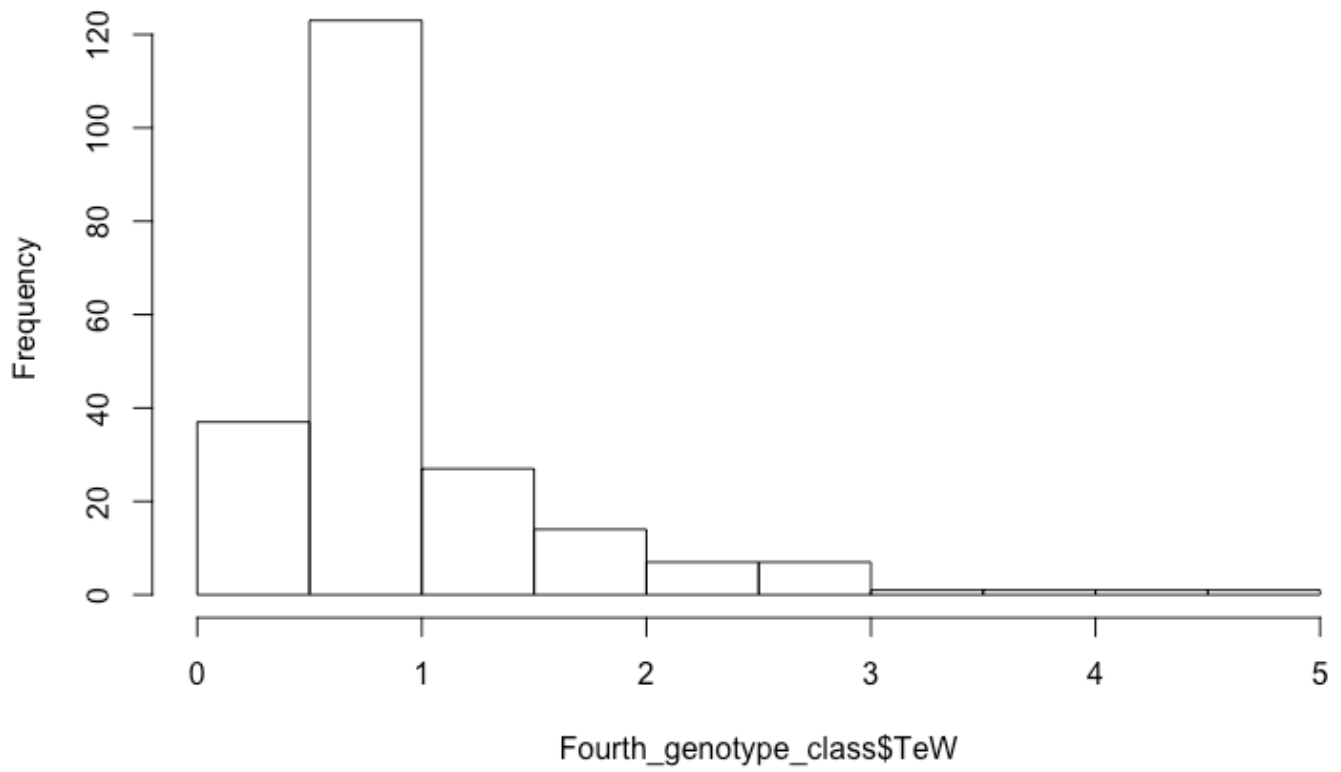

Supplement: 12864_2017_4252_MOESM3_ESM.pdf [file 12864_2017_4252_MOESM3_ESM.pdf]
